1 **Dynamic embedding of salience coding in hippocampal spatial maps**

2

3 Masaaki Sato<sup>1,2,3,4</sup>, Kotaro Mizuta<sup>1,5</sup>, Tanvir Islam<sup>1</sup>, Masako Kawano<sup>1</sup>, Takashi  
4 Takekawa<sup>1,6</sup>, Daniel Gomez-Dominguez<sup>1,7</sup>, Karam Kim<sup>1,8</sup>, Hiroshi Yamakawa<sup>1,9,10</sup>,  
5 Masamichi Ohkura<sup>3,4</sup>, Tomoki Fukai<sup>1</sup>, Junichi Nakai<sup>3,4</sup>, Yasunori Hayashi<sup>1,4,5,11</sup>

6

7 1, RIKEN Brain Science Institute, Wako, Saitama 351-0198, Japan; 2, PRESTO, Japan  
8 Science and Technology Agency, Kawaguchi, Saitama 332-0012, Japan; 3, Graduate  
9 School of Science and Engineering, Saitama University, Saitama 338-8570, Japan; 4,  
10 Brain and Body System Science Institute, Saitama University, Saitama 338-8570, Japan;  
11 5, Department of Pharmacology, Kyoto University Graduate School of Medicine, Kyoto  
12 606-8501, Japan; 6, Faculty of Informatics, Kogakuin University, Tokyo 163-8677, Japan;  
13 7, Instituto Cajal, CSIC, Madrid 28002, Spain; 8, Department of Pharmacology, University  
14 of California, Davis, CA 95616, USA; 9, DWANGO Co., Ltd., Tokyo 104-0061, Japan; 10,  
15 Whole Brain Architecture Initiative, Tokyo 113-0033, Japan; 11, School of Life Science,  
16 South China Normal University, Guangzhou 510631, China

17

18 Correspondence

19 msato@brain.riken.jp, masasato@mail.saitama-u.ac.jp (M.S.);

20 yhayashi-tky@umin.ac.jp (Y.H.)

21 **Summary**

22 Hippocampal CA1 neurons participate in dynamic ensemble codes for space and memory.  
23 Prominent features of the environment are represented by an increased density of place  
24 cells, but cellular principles governing the formation and plasticity of such disproportionate  
25 maps are unknown. We thus imaged experience-dependent long-term changes in spatial  
26 representations at the cellular level in the CA1 deep sublayer in mice learning to navigate  
27 in a virtual-reality environment. The maps were highly dynamic but gradually stabilized as  
28 over-representations for motivational (reward) and environmental (landmark) salience  
29 emerged in different time courses by selective consolidation of relevant spatial  
30 representations. Relocation of the reward extensively reorganized pre-formed maps by a  
31 mechanism involving rapid recruitment of cells from the previous location followed by their  
32 re-stabilization, indicating that a subset of neurons encode reward-related information. The  
33 distinct properties of these CA1 cells may provide a substrate by which salient experience  
34 forms lasting and adaptable memory traces.

## 35 **Introduction**

36           Navigation and spatial memory are essential elements of animal behavior that allow  
37 animals to forage, return home and avoid dangers. The hippocampus plays a crucial role  
38 in these cognitive processes, as hippocampal neurons fire when an animal is located in a  
39 particular part of an environment but not in others, providing an allocentric cognitive map  
40 of space (O'Keefe and Nadel, 1978). Although whether these "place cells" are indeed  
41 memory cells has been long debated, accumulating evidence supports this notion. One  
42 line of such evidence includes the knowledge that hippocampal place-specific firing  
43 exhibits dynamic changes according to context and experience on multiple time scales,  
44 ranging from a few minutes to days or weeks (Muller and Kubie, 1987; Bostock et al.,  
45 1991; Mehta et al., 1997; Lever et al., 2002; Leutgeb et al., 2005a). Moreover, studies  
46 have reported that a disproportionately large number of place cells are recorded at  
47 locations that are associated with reward, safety or walls or edges of the environment  
48 (O'Keefe and Conway, 1978; Wiener et al., 1989; Hetherington and Shapiro, 1997; Hollup  
49 et al., 2001; Dombeck et al., 2010; Dupret et al., 2010; Danielson et al., 2016), indicating  
50 that the environment surrounding an animal is not represented uniformly in the  
51 hippocampal map; their representations are strongly influenced by the motivational and  
52 environmental salience of the locations.

53           These findings imply that an increased number of place cells encode the presence  
54 of salience (i.e., something that draws attention) in the hippocampal map. This idea further  
55 proposes potential roles of such salience maps in not only spatial (Hollup et al., 2001;  
56 Dupret et al., 2010) or episodic-like memories (Komorowski et al., 2009; Eichenbaum and  
57 Cohen, 2014) but also goal-directed and landmark-based navigation (Gothard et al., 1996)  
58 because they can signal the subject's distance and direction relative to the represented  
59 salience by increases and decreases of population output activity to downstream neurons  
60 (Burgess and O'Keefe, 1996). Place cells are formed rapidly within minutes after initial

61 exposure to a new environment (Hill, 1978; Wilson and McNaughton, 1993; Frank et al.,  
62 2004). However, how the over-representation of salience is established and updated by  
63 experience has been poorly explored to date. Furthermore, mechanistic insights based on  
64 session-by-session comparisons of large-scale neuronal population data are also scarce.  
65 A few different but not mutually exclusive schemes are possible to answer this question.  
66 First, place cells are formed more preferentially for salient locations than non-salient  
67 locations from the beginning of place map formation (hereafter called the “direct formation”  
68 model) (Figure 1A). This model assumes that the probabilities of place cell formation are  
69 higher at salient locations. Second, place cells are initially formed uniformly for all  
70 locations, but cells that represent salient locations subsequently increase by recruiting the  
71 place cells that represent non-salient locations (“lateral recruitment” model) (Figure 1B).  
72 This model assumes that the probabilities of place cell formation are uniform across all  
73 locations and that the probabilities that place cells encoding non-salient locations turn into  
74 those encoding salient locations are higher than the probabilities that they continue to  
75 encode non-salient locations. Third, the place fields of all place cells potentially turn over  
76 dynamically, but spatial representations of salient locations are more stable than non-  
77 salient locations, leading to the persistence or accumulation of relevant spatial  
78 representations over time (“selective consolidation” model) (Figure 1C).

79         To elucidate the single or multiple forms of cellular dynamics that govern the  
80 formation and plasticity of the salience representation in the hippocampus, we  
81 longitudinally imaged place maps of the CA1 deep sublayer in a neuron-specific G-CaMP7  
82 transgenic mouse line during training on a virtual linear track, in which two distinct  
83 locations were associated with either reward or a visual landmark as motivational or  
84 environmental salience, respectively. The experiments allowed us to track the neuronal  
85 activities and anatomical positions of a large population of pyramidal cells within a  
86 particular area of the hippocampus over days and thus to examine the dynamic cellular

87 changes predicted differently by each of the above hypotheses. We found that initial  
88 establishment of over-represented salience maps is dominated by selective consolidation  
89 of the cells that encode each salient location but not by direct formation from non-place  
90 cells or lateral recruitment of the cells that encode non-salient locations. We also found  
91 that over-representations of motivational and environmental salience emerge with  
92 experience in different rapid versus delayed time courses, respectively. By contrast, robust  
93 reorganization of pre-established maps by rearrangement of salient features occurred via  
94 a coordinated interplay of these three processes. These findings reveal the distinct  
95 engagement of multiple forms of cellular dynamics in the establishment and reorganization  
96 of hippocampal salience maps and provide a mechanism by which experience of salient  
97 environmental features form lasting and adaptable traces in these maps.

98

## 99 **Results**

### 100 **Mice and behavioral task**

101 To reliably perform longitudinal imaging of large-scale hippocampal functional  
102 cellular maps, we generated a new transgenic mouse line that coexpresses the  
103 fluorescence calcium indicator protein G-CaMP7 and the calcium-insensitive red  
104 fluorescence marker protein DsRed2 via 2A peptide-mediated bicistronic expression under  
105 the neuron-specific Thy1 promoter. G-CaMP7 is an improved, highly sensitive G-CaMP  
106 variant that exhibits large fluorescence changes and rapid kinetics in response to a wide  
107 range of intracellular calcium concentrations (Ohkura et al., 2012; Pöder et al., 2015). We  
108 selected one mouse line, here termed Thy1-G-CaMP7, that expresses G-CaMP7 and  
109 DsRed2 in widespread brain areas at a high level in the adult brain (Figure 1D). In the  
110 dorsal CA1 hippocampus, the population of calbindin-negative pyramidal cells in the deep  
111 pyramidal cell sublayer was preferentially labeled with G-CaMP7 (Mizuseki et al., 2011;  
112 Kohara et al., 2014; Lee et al., 2014; Valero et al., 2015; Danielson et al., 2016) (Figure

113 1E). Immunofluorescence labeling against glutamic acid decarboxylase 65/67,  
114 parvalbumin or somatostatin revealed that interneurons positive for these markers were  
115 devoid of G-CaMP7 expression (Figure 1E and S1A). In addition to strong hippocampal  
116 expression (Figure S1B), G-CaMP7 expression was found in diverse brain areas, including  
117 the cerebral cortex, olfactory bulb, brainstem and cerebellum (Figure S1C-N), making  
118 Thy1-G-CaMP7 mice an attractive alternative to our previously reported TRE-G-CaMP7  
119 mice in various imaging studies (Sato et al., 2015).

120 To allow for imaging of hippocampal maps during repeated training of spatial  
121 behavior in a controlled environment, we used a head-fixed virtual reality (VR) system that  
122 consisted of an air-supported Styrofoam treadmill and a wide LCD monitor placed under a  
123 two-photon microscope (Sato et al., 2017) (Figure 1F). Thy1-G-CaMP7 mice were trained  
124 to run along a virtual linear track for water reinforcement (Figure 1G). In this task, a head-  
125 fixed mouse in a virtual environment ran unidirectionally through an open-ended linear  
126 track segment whose walls were textured with different patterns. The mouse started  
127 running from the origin of the segment, passed under a green gate as a visual landmark,  
128 received water at a reward point and returned to the origin after reaching the other end (for  
129 details, see Methods). The visual landmark and reward delivery were associated with two  
130 distinct locations in the track to examine the effects of two different kinds of salience  
131 separately. Because the transition was instantaneous and the patterns of the walls and  
132 floor appeared seamless, the mice kept running forward as if they ran along an infinitely  
133 long repetition of a corridor, similar to a real-world circular track and a head-fixed treadmill  
134 belt used elsewhere (Hollup et al., 2001; Danielson et al., 2016). In training, behavioral  
135 performance measured by distance traveled and time spent running during 10-min  
136 sessions markedly increased as training proceeded (Figure 1H-I; Distance,  $p < 0.0001$ ,  
137  $F_{(14,154)} = 7.30$ ; Run period,  $p < 0.0001$ ,  $F_{(14,154)} = 5.26$ ;  $n = 12$  mice from 3 groups, one-  
138 way ANOVA). In addition, running speed as a behavioral measure of familiarity (Frank et

139 al.,2004) also significantly increased during training ( $p < 0.0001$ ,  $F_{(14,154)} = 11.6$ ). This  
140 simple task thus allowed us to investigate experience-dependent changes in hippocampal  
141 representations of salient locations by cellular resolution functional imaging.

142

### 143 **Initial establishment of hippocampal salience maps**

144 We next sought to visualize how hippocampal CA1 place maps emerge from a  
145 naive state during training on the virtual endless linear track task, with a particular interest  
146 in whether and when the representations of the two salient locations become prominent in  
147 the map. Two-photon imaging of the CA1 pyramidal cell layer through an optical window in  
148 Thy1-G-CaMP7 mice provided an image of a large number of G-CaMP7-labeled pyramidal  
149 cells across the entire field of view (Figure 2A). Because the neuronal density of the dorsal  
150 CA1 pyramidal cell layer is very high, we computationally extracted the morphology and  
151 activity of individual neurons from time-lapse movies using a modified non-negative matrix  
152 factorization algorithm to ensure objective and reproducible image analysis (Vogelstein et  
153 al., 2010; Pnervmatikakis et al., 2016; Takekawa et al., 2017) (Figure S2). This algorithm  
154 assumes that time-varying fluorescence signals of each cell can be decomposed into the  
155 product of a spatial filter and a time variation of fluorescence intensity, which are estimated  
156 by two alternating iterative steps (for details, see Methods). The spatial filter represents the  
157 position and shape of the cell (Figure S2A-B). The timing of spiking activity is inferred  
158 using the assumption that each spike evokes transient elevations of fluorescence intensity  
159 with a double-exponential shape (Figure S2C).

160 Using these activity time traces, we determined the virtual location-specific activity  
161 by statistical testing of the mutual information content calculated between each cell's  
162 neuronal activity and the animal's virtual locations (Figure S2D-E). Accumulating evidence  
163 has demonstrated that "place cells" in the VR recapitulate many, though not all, place cell  
164 properties observed in real environments (Chen et al., 2013; Ravassard et al., 2013). We

165 thus called the cells that exhibited place cell-like virtual location-specific activity “virtual  
166 place cells (vPCs)” in this study and used them as a means to understand how information  
167 regarding the spatial aspect of the external world is represented in the hippocampal map.

168 Consistent with previous studies in real and virtual environments, vPCs were  
169 formed rapidly within the first session on the virtual linear track (Hill, 1978; Wilson and  
170 McNaughton, 1993; Frank et al., 2004; Chen et al., 2013) (Figure 2B-C). The initial  
171 fractions of vPCs were low but then increased as the training proceeded. The fraction of  
172 vPCs and that of time spent running showed a good overall correlation (Figure S3A). The  
173 parallel increase in these two factors during training thus suggested that the observed  
174 increase in vPCs might be simply due to more sensitive detection of vPCs, which was  
175 enabled by an increase in the length of data for virtual place field calculations. Thus, we  
176 created scatter plots of the fraction of vPCs against that of the time spent running for all  
177 seven animals for each of the 15 sessions and determined the slopes of the regression  
178 lines to obtain indices (termed the vPC formation factor) representing the amount of vPCs  
179 formed by a unit length of time spent running (Figure 2D-F). The vPC formation factor  
180 significantly increased in the late phase of training compared with the early phase (Figure  
181 2D-F). These results indicate that training indeed facilitated more effective formation of  
182 vPCs for a given amount of spatial experience. A separate analysis demonstrating that the  
183 sessions in the late phase contained larger fractions of vPCs than the sessions in the early  
184 phase with a comparable extent of running time also supports this idea (Figure S3B-C).

185 We then examined whether the virtual locations associated with salience were  
186 disproportionately over-represented in the hippocampal spatial map. The histograms of  
187 vPCs against the track position typically exhibited two large peaks, which were clearer in  
188 the late training phase; one peak corresponded to the location of the landmark (i.e., the  
189 green gate), and the other corresponded to that of the reward (Figure 2G). While the first  
190 peak closely matched the landmark location, the second peak was slightly shifted to the



191 direction of the mouse's running, which likely reflects that the animals recognized or  
192 anticipated the rewards at places that were slightly past the delivery point, as suggested  
193 by slowing down of running speed around this zone (data not shown). Importantly, the  
194 over-representation of the location for the reward was discernible even in the first session  
195 of training, whereas that of the location for the landmark gradually developed as the  
196 training proceeded (Figure 2G-I). The fraction of vPCs that encoded the location of the  
197 reward (here termed "reward cells" (RW) for convenience) was not significantly different  
198 between the early and late phases of training, whereas that of vPCs that encoded the  
199 location of the landmark (similarly termed "gate cells" (GT)) increased significantly with a  
200 complementary decrease in the fraction of vPCs that encoded other locations (termed  
201 "non-reward, non-gate vPCs" (NRNG)) (Figure 2H-I). The slower increase in vPCs that  
202 encode locations associated with salient visual cues is further supported by a more  
203 delayed and smaller increase in vPCs that encode a location with less visual salience,  
204 such as a boundary of different wall patterns (termed "wall cells" (WL), Figure S4).  
205 Collectively, these results demonstrate that the over-representation of salient locations is  
206 formed and maintained at a population level, even though the maps develop dynamically  
207 throughout the training period. The establishment and refinement of representations of  
208 salience depend on its nature; the representation of motivational salience is established  
209 rapidly, whereas that of environmental salience develops over the course of training.

210         What is the benefit of this salience representation in encoding and storage of  
211 information about the animal's environment? We trained a Bayesian decoder from the first  
212 150 s of the running period and reconstructed the animal's trajectory in the following 90 s  
213 using the activities of vPCs in the same sessions (Zhang et al., 1998; Ziv et al., 2013)  
214 (Figure 3A). The average median errors across all track positions were initially large in the  
215 early phase of training and decreased steadily as the training proceeded (Figure 3B), likely  
216 due to the training-induced increase in vPC number (Figure 3C). A more detailed analysis

217 of well-decoded sessions (average median error across all positions < 10 cm) revealed  
218 that the errors for the locations associated with the landmark and reward were significantly  
219 smaller than those for other locations (Figure 3D). These results demonstrate that the  
220 established salience maps enable more accurate population coding for these locations.

221

## 222 **Experience-dependent map consolidation**

223 The vPC maps imaged at each session appeared rather different from each other,  
224 even within the same animals, implying that hippocampal spatial representations are  
225 highly dynamic while being established (Figure 2B). This result further suggests that while  
226 new representations were created by each experience, at least in parts of the maps, pre-  
227 existing representations are either eliminated or stabilized. To gain insight into whether  
228 repeated training stabilizes the maps, we next investigated training-induced changes in the  
229 maps at an individual cell level by comparing the virtual place fields of the same cells  
230 across different sessions (Figure S5). In this analysis, we conservatively focused on  
231 comparisons between two consecutive sessions (i.e., sessions 1 and 2, 2 and 3, etc.)  
232 because the quality of the image alignment was gradually reduced as the number of  
233 sessions that separated the two images increased ( $P < 0.0001$ ,  $F_{(13, 721)} = 10.94$ , one-way  
234 ANOVA, Figure S5F). In the early maps, which contained a relatively small fraction of  
235 vPCs, only a small number of vPCs were identified as common in both sessions (hereafter  
236 called “common vPCs”), whereas the fraction of common vPCs increased significantly as  
237 more vPCs were imaged in the late phase of the training (Figure 4A-C). Moreover, the  
238 fraction of vPCs that had stable virtual place fields (< 10 cm difference) in both sessions  
239 (“stable vPCs”) also increased markedly as the training proceeded (Figure 4A-B, D-E),  
240 indicative of experience-dependent map consolidation. Image comparisons between  
241 adjacent sessions showed that fractions of common cells (i.e., cells that were identified in  
242 common in the two sessions) were constant over time ( $P = 0.57$ , repeated measures one-

243 way ANOVA) (Figure S5E), verifying that the increased stability of vPCs was not caused  
244 by differences in image alignment. Furthermore, the fractions of common and stable vPCs  
245 normalized by the number of vPCs also increased significantly as the training proceeded,  
246 revealing that the training-induced increase of vPC stability was not simply due to the  
247 increase of the number of vPCs (Figure S6). We then asked whether representations of  
248 salient locations are more stable than those of non-salient locations. We calculated the  
249 fractions of stable vPCs with respect to the number of common vPCs as an index for  
250 stable representations at each location and found that this index was significantly higher  
251 for locations associated with the landmark or reward than for other locations (Figure 4F-G).  
252 Finally, we tested the hypothesis that the stability of the maps predicts the performance of  
253 animals in the behavioral task. We found that the gain of vPC stability between the early  
254 and late phases of the training in individual animals exhibited a good linear correlation with  
255 their differences in time spent running between the two phases of the training ( $r = 0.84$ ,  
256 Figure 4H). The results suggest that hippocampal place maps are more strongly stabilized  
257 if the animals more effectively learn to run the virtual linear track task.

258

### 259 **Cellular dynamics for map establishment**

260 To elucidate the cellular mechanism for the map establishment, we conducted two  
261 analyses of the functional transitions of cells belonging to different virtual location-related  
262 cell categories between sessions (Figures 5 and S7). In the first analysis, common cells in  
263 a reference session N were classified into vPCs or non-vPCs (NvPC) according to their  
264 virtual location-related activities, and the probabilities of transitioning to the same or the  
265 other categories in the subsequent session N+1 were calculated (for details, see Methods)  
266 (Figure S7A). The probability of vPC to remain as a vPC,  $P_{\text{vPC-vPC}}$ , and that of “*de*  
267 *novo*” vPC formation from NvPC,  $P_{\text{NvPC-vPC}}$ , increased significantly between the early and  
268 late phases of training (Figure S7B-C), with complementary decreases in the probabilities

269 of vPC disappearance  $P_{\text{vPC-NvPC}}$  and NvPC stabilization  $P_{\text{NvPC-NvPC}}$  (Figure S7B). In  
270 addition,  $P_{\text{vPC-vPC}}$  was significantly greater than  $P_{\text{NvPC-vPC}}$  in both training phases (Figure  
271 S7B-C). This result implies that vPCs are more likely to be vPCs in the subsequent  
272 sessions than NvPCs are, and that such a stabilization process plays a major role in the  
273 increase in vPCs. Together, these results demonstrate that training induces expansion of  
274 the vPC population by shifting the balance of a dynamic exchange between vPCs and  
275 NvPCs toward the direction of vPC stabilization and formation.

276 Next, to clarify the contributions of the formation, recruitment and consolidation of  
277 vPCs in the establishment of salience maps (Figures 1A-C and 5A-C, see also  
278 Introduction), we further subclassified the vPC population into RW, GT and NRNG  
279 according to their virtual place field positions and analyzed the transitions between them  
280 for each vPC subcategory in the second analysis. The formation of vPCs from NvPCs  
281 exhibited significant biases toward RWs (Figure 5D). However, a subpopulation of vPCs  
282 that became NvPCs in subsequent sessions also exhibited a similarly biased distribution  
283 (Figure 5E). The net effect, calculated as their difference, resulted in no significant biases  
284 (Figure 5F), implying that the disproportionate formation of vPCs predicted by the “direct  
285 formation model” (Figure 1A) exists but is counteracted by a similar bias in the  
286 disappearance of part of the vPCs. In addition, the distribution of vPCs derived from former  
287 NRNGs appeared not to be biased toward RWs or GTs but was rather uniform (Figure  
288 5G), providing evidence against the “lateral recruitment model” (Figure 1B). In contrast, the  
289 distribution of vPCs derived from former GTs or RWs was substantially biased toward the  
290 location by which each of the two vPC subcategories was defined, as predicted by the  
291 “selective consolidation model” (Figures 1C and 5H-I). These results further confirm that  
292 RWs and GTs have a marked tendency to persistently encode the same locations and  
293 strongly support the idea that selective consolidation of relevant spatial representations is  
294 the primary mechanism underlying the establishment of hippocampal salience maps.

295

## 296 **Robust map reorganization by conjunction of salience**

297 Our findings for experience-dependent map establishment thus far imply that the  
298 stability of spatial representations in the hippocampal map can be controlled by the  
299 presence of salient features. This result raises a further question concerning how this  
300 process is engaged in the plasticity of pre-established maps, which was addressed by  
301 imaging the salience maps during re-training in the reward rearrangement task. In this  
302 task, mice trained on the standard virtual linear track (i.e., the track on which visual  
303 landmark and reward delivery were associated with two distinct locations) for 15 sessions  
304 were further trained for the following 5 sessions in the same linear track, except that the  
305 location of reward delivery was shifted to the landmark location (Figure 6A). This task  
306 allowed us to examine the changes in the map that occurred when mice re-experienced  
307 the environment in which two separately located salient features were now jointly  
308 presented. We divided the entire re-training period into early (session 1-2) and late  
309 (session 3-5) sessions. Distance traveled, running speed and fraction of time spent  
310 running were not significantly changed between before and after the reward  
311 rearrangement (Figure S8A-B). However, this manipulation triggered robust reorganization  
312 of the salience maps (Figure 6B). Notably, the fraction of vPCs decreased immediately  
313 after reward rearrangement but recovered as the re-training proceeded (Figures 6B and  
314 S8C). Furthermore, the over-representation of the previous reward location disappeared  
315 suddenly as early as the first rearrangement sessions, whereas over-representation of the  
316 location associated with the conjunction of the pre-existing landmark and the relocated  
317 reward was markedly enhanced over the course of re-training (Figure 6C-E). The effect of  
318 this enhanced over-representation appeared rather additive (normalized fractions of vPCs,  
319 Pre GT,  $1.14 \pm 0.10$ ; Pre RW,  $1.65 \pm 0.09$ ; Late GT+RW,  $1.89 \pm 0.18$ ), supporting the view  
320 that the magnitude of increases in place cell numbers represents the degree of salience in

321 the hippocampus map. Interestingly, the reward rearrangement also enhanced the  
322 representation of the location associated with the wall pattern transition (Figure 6C-E),  
323 demonstrating that a salience conjunction can also be formed broadly with a nearby less-  
324 salient visual cue.

325 Cell-by-cell comparisons of the maps imaged at adjacent sessions further revealed  
326 salience-dependent, location-specific regulation of hippocampal map stability (Figure 7A-  
327 D). The reward rearrangement triggered a significant reduction in stability for the  
328 representation of the previous reward location and the non-salient locations in the early  
329 phase of re-training, while the stability of the location with conjunctive salience was  
330 essentially maintained (Figure 7B and D). The stability of the non-salient locations  
331 recovered in the late phase, but that for the previous reward location remained low (Figure  
332 7C-D). These results demonstrate that the hippocampal map plasticity accompanies a  
333 redistribution of vPC stability through a short period of heightened map instability. The  
334 presence and absence of salience thus govern the hippocampal map representations  
335 through a dynamic regulation of place field stability.

336

### 337 **Cellular dynamics for map reorganization**

338 Finally, to elucidate the cellular mechanism underlying the salience rearrangement-  
339 induced map plasticity, we analyzed the contribution of direct formation, lateral recruitment  
340 and selective consolidation of vPCs during this process (Figures 1A-C and 8). For  
341 simplicity of terminology, cell categories are labeled based on the condition before reward  
342 rearrangement. More specifically, GT and RW cells refer to the vPCs that encode the  
343 landmark and reward locations at the time before reward rearrangement, and their field  
344 positions maintain the same designations so that they become associated with the  
345 landmark plus reward and no salience after reward rearrangement, respectively. The  
346 reward rearrangement elicited a rapid and sustained reduction in *de novo* formation of RW

347 from NvPCs in the early and late phases and a delayed increase in *de novo* GT formation  
348 in the late phase of re-training (Figure 8A-i and B-i). The elimination of RW into NvPCs  
349 subsided in the late phase (Figure 8A-ii and B-ii), likely reflecting the substantial reduction  
350 of the RW formation in the preceding early phase. Consequently, the net effect gave rise  
351 to a remarkable transient decrease in RW formation in the early phase and a delayed  
352 increase in GT formation (Figure 8A-iii and B-iii). These results demonstrate that the  
353 reward rearrangement and the formation of conjunctive salience markedly influence the  
354 net vPC formation and that this salience-dependent down- and up-regulation of vPC  
355 formation underlies the rapid decrease in the vPC fraction and disappearance of the over-  
356 representation of the previous RW location in the early phase and the recovery of the vPC  
357 fraction and enhancement of the over-representation of the GT location in the late phase  
358 of plasticity.

359         The major mechanistic differences between map establishment and reorganization  
360 are not limited to the regulation of vPC formation. The reward rearrangement significantly  
361 increased recruitment of GT from NRNGs toward the late phase of re-training (Figure 8A-iv  
362 and B-iv). Furthermore, the recruitment of GT from RW also exhibited a significant  
363 transient increase in the early phase of re-training (Figure 8A-vi and B-vi). These results  
364 indicate that a conjunction of salience formed by reward rearrangement augments the  
365 recruitment of vPCs that encode a previously salient location as well as non-salient  
366 locations. The density of stable RW cells exhibited a sudden and prolonged drop in the  
367 early and late phases (Figure 8A-vi and B-vi), whereas that of GT remained high  
368 throughout the re-training period (Figure 8A-v and B-v), consistent with earlier findings  
369 (Figure 7). In summary, the salience rearrangement-induced map reorganization is  
370 mediated by a rapid disappearance of the over-representation of the previously salient  
371 location followed by a gradual enhancement of the over-representation of the location  
372 associated with a newly formed strong conjunction of salience. In contrast to the primary

373 role of selective place field stabilization in initial map establishment, the adaptive change  
374 of the hippocampal salience map is cooperatively achieved by multiple forms of cellular  
375 dynamics that involve not only stabilization but also direct formation and lateral recruitment  
376 of place cells (Figure 8C, see Discussion for details). Notably, GT cells immediately after  
377 reward rearrangement were derived more from RW cells than from NRNG cells (46 RW-to-  
378 GT cells and 36 NRNG-to-GT cells of 107 total GT cells from 7 mice compared with 22  
379 and 70 cells, which were expected from the uniform distribution across positions,  $P <$   
380 0.0001, Chi-square test). This suggests that RW cells form a unique subpopulation in CA1  
381 and may encode information associated with the reward itself (Figure S9).

382

## 383 **Discussion**

384 Theories of hippocampus-dependent memory and navigation are based on the  
385 premise that spatial and non-spatial information are jointly represented in the  
386 hippocampus (Knierim et al., 2006; Eichenbaum and Cohen, 2014). Accumulating  
387 evidence demonstrates that reward or geometric cues associated with particular locations  
388 are represented by an increased density of relevant place cells in hippocampal neural  
389 maps, particularly those in the CA1 deep sublayer (O'Keefe and Conway, 1978; Wiener et  
390 al., 1989; Hetherington and Shapiro, 1997; Hollup et al., 2001; Dombeck et al., 2010;  
391 Dupret et al., 2010; Danielson et al., 2016). By tracking the activity of individual neurons in  
392 G-CaMP7 transgenic mice trained in a spatial task in virtual reality, we investigated the  
393 cellular principles underlying the formation and plasticity of these maps. We observed that  
394 over-representation of salient locations occurred with different time courses and degrees  
395 depending on the nature and extent of salience, which resulted in more precise population  
396 coding for these locations. We also showed that hippocampal maps were consolidated by  
397 experience-dependent stabilization that was correlated with the behavioral performance of  
398 the animals. Moreover, stabilization of spatial representations for salient locations but not



399 *de novo* formation and lateral recruitment supported the establishment of the over-  
400 represented maps, providing evidence that place field stability is fine-tuned by experience  
401 and salience. Finally, we revealed that reorganization of pre-formed maps was mediated  
402 by a coordinated interplay of *de novo* formation, lateral shifts and selective consolidation.  
403 These findings provide a comprehensive framework for cellular mechanisms underlying  
404 the formation and plasticity of hippocampal functional maps and explain how salient  
405 experience can form lasting yet adaptable memory traces.

406

### 407 **Cellular mechanisms for formation and plasticity of hippocampal maps**

408         The observed contrasting cellular dynamics between map formation and plasticity  
409 suggests that hippocampal circuits transit between two distinct modes during different  
410 experiences. Based on our observations, we propose the following model — during initial  
411 map formation, *de novo* place cell formation biased toward salient locations is  
412 counteracted by similarly biased place cell removal, whereas over-representations are  
413 developed and maintained by a selective consolidation and elevated equilibrium state of  
414 salient place cells with little input from neutral place cells by lateral recruitment. This  
415 “encoding” mode is dynamically shifted to “updating” mode upon rearrangement of salient  
416 features. Thus, the balanced formation and disappearance of place cells is transiently  
417 disequibrated during the early phase of map plasticity to achieve a rapid shift in the peak  
418 place cell density. In parallel, a subset of cells that encoded previously salient locations  
419 rapidly move their fields to locations with relocated features during the early phase,  
420 followed by further recruitment of neutral place cells during the late phase. These  
421 processes are accompanied by transient weakening of place cell stability during the early  
422 phase and its recovery during the late phase. Thus, our findings indicate that a simple  
423 stabilization principle, which allows for encoding salient locations as more persistent traces  
424 and allocating more cellular resources to them, governs map formation, whereas parallel

425 and coordinated engagement of multiple processes, which supports the rapid updating of  
426 stored information, controls the adaptive reorganization of pre-established maps.

427         The model assumes that neural signals conveying information about the presence  
428 of salience modulate the above processes. For example, salience signals may modulate  
429 place cell stability via a dopamine-dependent mechanism (Kentros et al., 2004) and place  
430 field formation and disappearance at CA1 pyramidal cell dendrites and EC3 inputs (Bittner  
431 et al., 2015; Sheffield et al., 2015). The salience-chasing property observed in this study  
432 (i.e., from RW to RW+GT) may arise within or outside the hippocampus (Weible et al.,  
433 2009; Deshmukh and Knierim, 2011; Tsao et al., 2013). Remarkably, the lateral  
434 recruitment of neutral place cells identified in the late phase of plasticity may be mediated  
435 by a mechanism different from salience chasing that likely reflects the binding of cells to a  
436 reference frame of salience (Gothard et al., 1996) and may require stronger signals  
437 derived from salience conjunction to occur. Such powerful signals may effectively permit  
438 “overwriting” of pre-existing neutral place fields with those for salient locations, whereas  
439 modest salience signals only facilitate *de novo* place field formation from non-place cells.

440

#### 441 **Salience coding in the deep CA1 sublayer**

442         The finding that the time course and magnitude of increases in place cell density  
443 vary depending on the nature and extent of salient features advances the idea that the  
444 hippocampal deep CA1 sublayer is specialized for salience mapping and proposes a map-  
445 based hippocampal salience code that is different from the known firing rate-based coding  
446 scheme (Leutgeb 2005b; Komorowski et al., 2009). Unlike previous studies, we observed  
447 that the over-representation of salient locations arose in a task that involved learning of  
448 salience-place associations through repetitive experience rather than explicit goal-directed  
449 spatial navigation (Dupret et al., 2010; Danielson et al., 2016). This observation favors the  
450 notion that hippocampal encoding of salience occurs rather automatically without effortful

451 goal-driven learning. Rapid mapping of motivational salience is consistent with its strong  
452 behavioral relevance as the source of positive reinforcement, whereas gradual mapping of  
453 environmental salience presumably reflects experience-dependent learning of the  
454 environment that could contribute to landmark-based navigation (Sato et al., 2017). The  
455 extra quantity and stability as well as the idiosyncratic salience-chasing property of place  
456 cells for salient locations imply that such “complex” place cells may constitute  
457 subpopulations distinct from “simple” place cells for neutral locations in the CA1 deep  
458 sublayer (Gauthier and Tank, 2017; Geiller et al., 2017).

459         The present findings raise a crucial question as to how the presence of salience is  
460 signaled to the CA1 deep sublayer. The emergence of reward and landmark over-  
461 representations with different time courses suggest that signals for each salience arise  
462 from different sources, the same source with different patterns and intensities, or perhaps  
463 a combination of these. Recent studies demonstrate that reward-responsive ventral  
464 tegmental area (VTA) neurons are reactivated during rest periods (Gomperts et al., 2015;  
465 Valdés et al., 2015) and optogenetic activation of dopaminergic VTA inputs to CA1  
466 sustains newly acquired hippocampal spatial representations and memory (McNamara et  
467 al., 2014), pointing to VTA dopaminergic input as a potential signal for motivational  
468 salience. The hippocampus integrates spatial information from the medial entorhinal cortex  
469 (MEC) with non-spatial information from LEC to represent objects and events within a  
470 spatial context (Knierim et al., 2006; Eichenbaum and Cohen, 2014). LEC neurons start to  
471 fire in the vicinity of objects and reward when these features are introduced to the  
472 environment (Deshmukh and Knierim, 2011; Tsao et al., 2013). Notably, long-range  
473 inhibitory projections from LEC to the dorsal CA1 area respond to diverse salient stimuli,  
474 including aversive, motivational and other sensory cues (Basu et al., 2016), making them a  
475 candidate for the putative salience signals. Although salience signals may further arise  
476 from brain areas other than VTA and LEC, these signals may act to stabilize

477 representations of salient locations in the CA1 deep sublayer, potentially through  
478 enhanced reactivation of relevant experience (Singer and Frank, 2009). The deep  
479 sublayer-specific CA2 input and mutual suppression between the two sublayers (Kohara et  
480 al., 2014; Lee et al., 2014) may help to associate the deep sublayer map more with those  
481 salience signals.

482 **Acknowledgments**

483 We thank Charles Yokoyama, Thomas McHugh, Shigeyoshi Fujisawa and Liset Menendez  
484 de la Prida for their comments on the manuscript. This work was supported by Precursory  
485 Research for Embryonic Science and Technology (PRESTO) JPMJPR12A1 from the  
486 Japan Science and Technology Agency (JST) and KAKENHI Grants 21800091,  
487 24700403, 25116528, 26115530 and 17H05985 from the Ministry of Education, Culture,  
488 Sports, Science and Technology (MEXT)/Japan Society for the Promotion of Science  
489 (JSPS) to M.S., RIKEN, NIH grant R01DA17310, Grant-in-Aid for Scientific Research on  
490 Innovative Area "Foundation of Synapse and Neurocircuit Pathology" from MEXT, Human  
491 Frontier Science Program, and High-end Foreign Experts Recruitment Program of  
492 Guangdong Province to Y.H., KAKENHI Grants 26870577 to T.T., 25830023 and  
493 15H01571 to K.M., 15H04265 to T.F and 26115504, 25111703 and 21115504 to J.N, and  
494 Regional Innovation Cluster Program (City Area Type, Central Saitama Area) from MEXT  
495 to J.N. and M.O. D.G-D. is a recipient of the Ph.D. fellowship BES-2013-064171 and a  
496 grant from the short-term visit program EEBS-I-15-09552.

497

498 **Author Contributions**

499 M.S. and Y.H. designed the study. M.S. and M.K generated the Thy1-G-CaMP7 transgenic  
500 mice. M.S. and T.I. built the virtual reality set-up. M.S., K.M., M.K., D.G.-D. and K.K.  
501 performed the imaging experiments. M.S., K.M., T.I. and T.T. analyzed the data. M.O. and  
502 J.N. made the G-CaMP7-T2A-DsRed2 transgene. T.T., M.S., H.Y. and T.F. developed the  
503 image analysis software. M.S. and Y.H. wrote the paper.

504

505 **Declaration of interests**

506 Y.H. was supported in part by Takeda Pharmaceutical Co. Ltd. and Fujitsu Laboratories.

507

508 **References**

- 509 Basu, J., Zaremba, J. D., Cheung, S. K., Hitti, F.L., Zemelman, B. V., Losonczy, A., and  
510 Siegelbaum, S. A. (2016). Gating of hippocampal activity, plasticity, and memory by  
511 entorhinal cortex long-range inhibition. *Science* 351, aaa5694.
- 512 Bittner, K. C., Grienberger, C., Vaidya, S. P., Milstein, A. D., Macklin, J. J., Suh, J,  
513 Tonegawa, S., and Magee, J. C. (2015). Conjunctive input processing drives feature  
514 selectivity in hippocampal CA1 neurons. *Nat. Neurosci.* 18, 1133–1142.
- 515 Burgess, N. and O’Keefe, J. (1996). Neuronal computations underlying the firing of place  
516 cells and their role in navigation. *Hippocampus* 6, 749–762.
- 517 Bostock, E., Muller, R. U. and Kubie, J. L. (1991). Experience-dependent modifications of  
518 hippocampal place cell firing. *Hippocampus* 1, 193–205.
- 519 Chen, G., King, J. A., Burgess, N. and O’Keefe, J. (2013). How vision and movement  
520 combine in the hippocampal place code. *Proc. Natl. Acad. Sci. U.S.A.* 110, 378–383.
- 521 Danielson, N. B., Zaremba, J. D., Kaifosh, P., Bowler, J., Ladow, M., and Losonczy, A.  
522 (2016). Sublayer-Specific Coding Dynamics during Spatial Navigation and Learning in  
523 Hippocampal Area CA1. *Neuron* 91, 652–665.
- 524 Deshmukh, S. S. and Knierim, J. J. (2011). Representation of Non-Spatial and Spatial  
525 Information in the Lateral Entorhinal Cortex. *Front. Behav. Neurosci.* 5, 69.
- 526 Dombeck, D. A., Harvey, C. D., Tian, L., Looger, L. L. and Tank, D. W. (2010). Functional  
527 imaging of hippocampal place cells at cellular resolution during virtual navigation. *Nat.*  
528 *Neurosci.* 13, 1433–40.
- 529 Dupret, D., O’Neill, J., Pleydell-Bouverie, B. and Csicsvari, J. (2010). The reorganization  
530 and reactivation of hippocampal maps predict spatial memory performance. *Nat.*  
531 *Neurosci.* 13, 995–1002.
- 532 Eichenbaum, H. and Cohen, N. J. (2014). Can We Reconcile the Declarative Memory and  
533 Spatial Navigation Views on Hippocampal Function? *Neuron* 83, 764–770.

- 534 Frank, L. M., Stanley, G. B. and Brown, E. N. (2004). Hippocampal plasticity across  
535 multiple days of exposure to novel environments. *J. Neurosci.* *24*, 7681–7689.
- 536 Gauthier J. and Tank D.W. (2017). Context-invariant encoding of reward location in a  
537 distinct hippocampal population. bioRxiv, <https://doi.org/10.1101/207043>.
- 538 Geiller, T., Fattahi, M., Choi, J.S. and Royer S. (2017). Place cells are more strongly tied to  
539 landmarks in deep than in superficial CA1. *Nat. Commun.* *8*, 14531.
- 540 Gomperts, S. N., Kloosterman, F. and Wilson, M. A. (2015). VTA neurons coordinate with  
541 the hippocampal reactivation of spatial experience. *eLife* *4*, e05360.
- 542 Gothard, K. M., Skaggs, W. E., Moore, K. M. and McNaughton, B. L. (1996). Binding of  
543 hippocampal CA1 neural activity to multiple reference frames in a landmark-based  
544 navigation task. *J. Neurosci.* *16*, 823–835.
- 545 Hetherington, P. A. and Shapiro, M. L. (1997). Hippocampal place fields are altered by the  
546 removal of single visual cues in a distance-dependent manner. *Behav. Neurosci.* *111*,  
547 20–34.
- 548 Hill, A.J. (1978). First occurrence of hippocampal spatial firing in a new environment. *Exp.*  
549 *Neurol.* *62*, 282-97.
- 550 Hollup, S. A., Molden, S., Donnett, J. G., Moser, M. B. and Moser, E. I. (2001).  
551 Accumulation of hippocampal place fields at the goal location in an annular watermaze  
552 task. *J. Neurosci.* *21*, 1635–1644.
- 553 Kentros, C. G., Agnihotri, N. T., Streater, S., Hawkins, R. D. and Kandel, E. R. (2004).  
554 Increased attention to spatial context increases both place field stability and spatial  
555 memory. *Neuron* *42*, 283–295.
- 556 Knierim, J. J., Lee, I. and Hargreaves, E. L. (2006). Hippocampal place cells: Parallel input  
557 streams, subregional processing, and implications for episodic memory. *Hippocampus*  
558 *16*, 755–764.

- 559 Kohara, K., Pignatelli, M., Rivest, A.J., Jung, H. Y., Kitamura, T., Suh, J, Frank, D.,  
560 Kajikawa, K., Mise, N., Obata, Y., et al. (2014). Cell type-specific genetic and  
561 optogenetic tools reveal hippocampal CA2 circuits. *Nat Neurosci* 17, 269–279
- 562 Komorowski, R. W., Manns, J. R. and Eichenbaum, H. (2009). Robust Conjunctive Item–  
563 Place Coding by Hippocampal Neurons Parallels Learning What Happens Where. *J.*  
564 *Neurosci.* 29, 9918–9929.
- 565 Lee, S. H., Marchionni, I., Bezaire, M., Varga, C., Danielson, N., Lovett-Baron, M.,  
566 Losonczy, A, and Soltesz, I. (2014). Parvalbumin-Positive Basket Cells Differentiate  
567 among Hippocampal Pyramidal Cells. *Neuron* 82, 1129–1144.
- 568 Leutgeb, J. K., Leutgeb, S., Treves, A., Meyer, R., Barnes, C. A., McNaughton, B. L.,  
569 Moser, M. B., and Moser, E. I. (2005a). Progressive transformation of hippocampal  
570 neuronal representations in ‘morphed’ environments. *Neuron* 48, 345–358.
- 571 Leutgeb, S., Leutgeb, J. K., Barnes, C. A., Moser, E. I., McNaughton, B. L., and Moser, M.  
572 B. (2005b). Independent codes for spatial and episodic memory in hippocampal  
573 neuronal ensembles. *Science* 309, 619–623.
- 574 Lever, C., Wills, T., Cacucci, F., Burgess, N. and O’Keefe, J. (2002). Long-term plasticity in  
575 hippocampal place-cell representation of environmental geometry. *Nature* 416, 90–94.
- 576 McNamara, C. G., Tejero-Cantero, Á., Trouche, S., Campo-Urriza, N. and Dupret, D.  
577 (2014). Dopaminergic neurons promote hippocampal reactivation and spatial memory  
578 persistence. *Nat. Neurosci.* 17, 1658–1660.
- 579 Mehta, M. R., Barnes, C. A. and McNaughton, B. L. (1997). Experience-dependent,  
580 asymmetric expansion of hippocampal place fields. *Proc. Natl. Acad. Sci. U.S.A.* 94,  
581 8918–8921.
- 582 Mizuseki, K., Diba, K., Pastalkova, E. and Buzsáki, G. (2011). Hippocampal CA1  
583 pyramidal cells form functionally distinct sublayers. *Nat. Neurosci.* 14, 1174–1181.



- 584 Muller, R. U. and Kubie, J. L. (1987). The effects of changes in the environment on the  
585 spatial firing of hippocampal complex-spike cells. *J. Neurosci.* 7, 1951–1968.
- 586 Ohkura, M., Sasaki, T., Sadakari, J., Gengyo-Ando, K., Kagawa-Nagamura, Y.,  
587 Kobayashi, C., Ikegaya, Y., and Nakai, J. (2012). Genetically Encoded Green  
588 Fluorescent Ca<sup>2+</sup> Indicators with Improved Detectability for Neuronal Ca<sup>2+</sup> Signals.  
589 *PLoS ONE* 7, e51286.
- 590 O’Keefe, J. and Conway, D. H. (1978). Hippocampal place units in the freely moving rat:  
591 why they fire where they fire. *Exp. Brain Res.* 31, 573–590.
- 592 O’Keefe J. and Nadel L. (1978). *The hippocampus as a cognitive Map*. Oxford: Clarendon.
- 593 Pnevmatikakis, E. A., Soudry, D., Gao, Y., Machado, T. A., Merel, J., Pfau, D., Reardon,  
594 T., Mu, Y., Lacefield, C., Yang, W., et al. (2016). Simultaneous Denoising,  
595 Deconvolution, and Demixing of Calcium Imaging Data. *Neuron* 89, 285–299.
- 596 Podor, B., Hu, Y. L., Ohkura, M., Nakai, J., Croll, R., and Fine, A. (2015). Comparison of  
597 genetically encoded calcium indicators for monitoring action potentials in mammalian  
598 brain by two-photon excitation fluorescence microscopy. *Neurophotonics* 2, 021014.
- 599 Ravassard, P., Kees, A., Willers, B., Ho, D., Aharoni, D. A., Cushman, J., Aghajan, Z. M.,  
600 and Mehta, M. R. (2013). Multisensory control of hippocampal spatiotemporal  
601 selectivity. *Science* 340, 1342–1346.
- 602 Sato, M., Kawano, M., Ohkura, M., Gengyo-Ando, K., Nakai, J., and Hayashi, Y. (2015).  
603 Generation and Imaging of Transgenic Mice that Express G-CaMP7 under a  
604 Tetracycline Response Element. *PLoS ONE* 10, e0125354.
- 605 Sato, M., Kawano, M., Mizuta, K., Islam, T., Lee, M. G., and Hayashi, Y. (2017).  
606 Hippocampus-dependent goal localization by head-fixed mice in virtual reality. *eNeuro*  
607 4, e0369-16.2017.
- 608 Sheffield, M. E. J. and Dombeck, D. A. (2015). Calcium transient prevalence across the  
609 dendritic arbour predicts place field properties. *Nature* 517, 200–204.

- 610 Singer, A. C. and Frank, L. M. (2009). Rewarded outcomes enhance reactivation of  
611 experience in the hippocampus. *Neuron* 64, 910-921 (2009) .
- 612 Takekawa, T., Asai, H., Ohkawa, N., Nomoto, M., Okubo-Suzuki, R., Ghandour, K., Sato,  
613 M., Hayashi, Y., Inokuchi, K., and Fukai, T. (2017). Automatic sorting system for large  
614 calcium imaging data. bioRxiv, <https://doi.org/10.1101/215145>.
- 615 Tsao, A., Moser, M. B. and Moser, E. I. (2013). Traces of Experience in the Lateral  
616 Entorhinal Cortex. *Curr. Biol.* 23, 399–405.
- 617 Valdés, J. L., McNaughton, B. L. and Fellous, J. M. (2015). Offline reactivation of  
618 experience-dependent neuronal firing patterns in the rat ventral tegmental area. *J.*  
619 *Neurophysiol.* 114, 1183–1195.
- 620 Valero, M., Cid, E., Averkin, R.G., Aguilar, J., Sanchez-Aguilera, A., Viney, T.J., Gomez-  
621 Dominguez, D., Bellistri, E., and de la Prida, L.M. (2015). Determinants of different  
622 deep and superficial CA1 pyramidal cell dynamics during sharp-wave ripples. *Nat.*  
623 *Neurosci.* 18, 1281–1290.
- 624 Vogelstein, J. T., Packer, A. M., Machado, T. A., Sippy, T., Babadi, B., Yuste, R., and  
625 Paninski, L. (2010). Fast Nonnegative Deconvolution for Spike Train Inference From  
626 Population Calcium Imaging. *J. Neurophysiol.* 104, 3691–3704.
- 627 Weible, A. P., Rowland, D. C., Pang, R. and Kentros, C. (2009). Neural Correlates of  
628 Novel Object and Novel Location Recognition Behavior in the Mouse Anterior  
629 Cingulate Cortex. *J. Neurophysiol.* 102, 2055–2068.
- 630 Wiener, S. I., Paul, C. A. and Eichenbaum, H. (1989). Spatial and behavioral correlates of  
631 hippocampal neuronal activity. *J. Neurosci.* 9, 2737–2763.
- 632 Wilson, M. A. and McNaughton, B. L. (1993). Dynamics of the hippocampal ensemble  
633 code for space. *Science* 261, 1055–1058.

- 634 Zhang, K., Ginzburg, I., McNaughton, B. L. and Sejnowski, T. J. (1998). Interpreting  
635 Neuronal Population Activity by Reconstruction: Unified Framework With Application to  
636 Hippocampal Place Cells. *J. Neurophysiol.* 79, 1017–1044.
- 637 Ziv, Y., Burns, L. D., Cocker, E. D., Hamel, E. O., Ghosh, K. K., Kitch, L. J., Gamal, A. E.,  
638 and Schnitzer, M. J. (2013). Long-term dynamics of CA1 hippocampal place codes.  
639 *Nat. Neurosci.* 16, 264–266.

640 **Figure legends**

641 **Figure 1. Models, transgenic mice and behavioral task.** (A-C) Models that can account  
642 for the formation of hippocampal over-representation of salient locations. (A) Direct  
643 formation model. (B) Lateral recruitment model. (C) Selective consolidation model. See  
644 Introduction for details. (D) Transgene construct for Thy1-G-CaMP7 mice (top) and  
645 expression of G-CaMP7 (bottom left, green) and DsRed2 (bottom right, red) in a  
646 parasagittal section of a mouse at 6 months of age. Scale bar = 2 mm. (E)  
647 Characterization of the G-CaMP7-expressing cell population in the dorsal CA1  
648 hippocampus of Thy1-G-CaMP7 transgenic mice. Sections of mice at 2-3 months of age  
649 were immunolabeled with anti-calbindin (Calb, left) or anti-glutamic acid decarboxylase  
650 65/67 (GAD, right) antibodies (magenta). Arrowheads indicate examples of calbindin-  
651 positive, G-CaMP7-negative cells. SO, *stratum oriens*; SP, *stratum pyramidale*; SR,  
652 *stratum radiatum*. Scale bar = 20  $\mu$ m. (F) A schematic representation of the two-photon  
653 microscope and virtual reality setup used in this study. (G) Virtual endless linear track task.  
654 The linear track segment contained a green gate as a visual landmark and a reward  
655 delivery point at two distinct locations. When the mouse's virtual position reached the point  
656 indicated by the red dotted line in the middle, it returned to the origin, so the same track  
657 segment was presented repeatedly. The bottom panel shows a camera view of the track  
658 displayed on the LCD monitor. (H) Example behavioral data from a single 10-min session.  
659 From top to bottom, the mouse's virtual position on the linear track, running speed, timing  
660 of reward delivery, and behavioral state during which a period of running is represented in  
661 blue. (I) Behavioral changes induced by repeated training. Total distance traveled  
662 (Distance, upper left), the fraction of time spent running (Run period, upper right) and  
663 running speed (Speed, lower left) are shown.

664

665 **Figure 2. Establishment of salience maps in the hippocampal CA1 deep sublayer.**  
666 (A) *In vivo* two-photon imaging of G-CaMP7-expressing CA1 pyramidal neurons through a  
667 hippocampal imaging window. A stainless cylindrical imaging window with a glass  
668 coverslip attached to the bottom was implanted above the dorsal CA1 (dCA1) area of the  
669 hippocampus (HP) after aspiration of the overlying cortical tissue (left). A representative  
670 fluorescence image of G-CaMP7-expressing pyramidal neurons in the dorsal CA1  
671 hippocampus (right). Active cells are shown as bright cells in this grayscale image. Scale  
672 bar = 100  $\mu$ m. A, anterior; L, lateral. (B) Examples of virtual place cell (vPC) maps imaged  
673 in the same animal at the early (session 1), middle (session 7) and late (session 14)  
674 phases of training on the virtual endless linear track task (top). vPCs and non-vPCs  
675 (NvPC) are represented by filled circles of various colors and gray dots, respectively. The  
676 different colors of the filled circles represent different locations of the virtual place fields.  
677 Heat maps shown below are distributions of virtual place fields of the corresponding  
678 sessions ordered by their positions (bottom). (C) The fractions of vPCs relative to the  
679 number of total identified cells imaged at each session. (D) Example scatter plots showing  
680 the relationship between the fraction of vPCs and the fraction of time spent running for  
681 early (session 4), middle (session 9) and late (session 15) phases of the training. The red  
682 line in each panel represents linear regression. The value shown at top right indicates the  
683 vPC formation factor, which is defined as the slope of the regression line. (E) Changes of  
684 vPC formation factors during training. (F) Averages of vPC formation factors for early  
685 (sessions 1 - 5), middle (sessions 6 - 10) and late (sessions 11 - 15) phases of training. \*P  
686 = 0.030, ANOVA with post hoc test for linear trend, n = 5 sessions each. (G) Histograms  
687 indicating the distribution of vPCs with respect to the track position for early (session 1),  
688 middle (session 6) and late (session 12) phases of the training. The average data from 7  
689 mice are shown. For comparison, the histogram of the early phase was scaled by its  
690 maximum value to that of the late phase and is plotted in light blue on its right Y-axis. The

691 green, red and magenta dashed lines delineate the positions of the landmark, reward  
692 delivery and boundary of different wall patterns, respectively. The areas shown in green,  
693 red and magenta indicate those that define gate, reward and wall cells, respectively. (H)  
694 Hippocampal spatial representations as expressed by the fractions of gate cells (GT,  
695 green), non-reward, non-gate vPCs (NRNG, blue), and reward cells (RW, red) relative to  
696 the number of total vPCs identified in each session. Values were normalized to that  
697 obtained in the case of uniform distribution (i.e., 0.0125/bin), and values greater than 1  
698 indicate that the locations are over-represented. (I) Average normalized fractions of GT  
699 (green), NRNG (blue) and RW (red) for the early, middle and late phases of the training.  
700 <sup>\*a</sup>,  $P = 0.017$ ,  $F_{(2,12)} = 4.91$ ; <sup>\*b</sup>,  $P = 0.017$ ,  $F_{(2,12)} = 4.79$ ; n.s. <sup>c</sup>,  $P = 0.78$ ,  $F_{(2,12)} = 0.247$ ; one-  
701 way ANOVA,  $n = 5$  sessions each; <sup>#d</sup>,  $P = 0.011$  vs. NRNG Early,  $F_{(1.101, 4.405)} = 8.40$ ; <sup>###e</sup>,  
702  $P = 0.0006$  vs. NRNG Middle; <sup>##f</sup>,  $P = 0.0076$  vs. NRNG Middle,  $F_{(1.138, 4.550)} = 26.5$ ; <sup>###g</sup>,  
703  $P = 0.0006$  vs. NRNG Late; <sup>###h</sup>,  $P = 0.0006$  vs. NRNG Late,  $F_{(1.449, 5.795)} = 73.5$ ; one-way  
704 ANOVA;  $n = 5$  sessions each.

705

706 **Figure 3. Precise estimation of salient locations by over-represented CA1 salience**  
707 **maps.** (A). Examples of trajectories estimated by the Bayesian decoder for early (top) and  
708 late (bottom) phases of training. The results of the entire 90-second test periods from the  
709 same animal are shown. Blue and red lines represent real and estimated trajectory,  
710 respectively. Periods of immobility that separated continuous running were excluded from  
711 decoding and their positions are indicated by vertical dashed lines. (B) Average median  
712 errors for the early, middle and late phases of training. <sup>\*</sup> $P = 0.018$ ,  $F_{(2,54)} = 3.65$ , one-way  
713 ANOVA,  $n = 15$ , 19 and 23 sessions. (C). Relationship between absolute vPC numbers  
714 and average median estimation errors across the locations. The symbols filled with pink,  
715 red and dark red indicate sessions in the early, middle and late phases, respectively. The  
716 dashed line represents the threshold for well-decoded sessions. Only the sessions with

717 running times  $\geq 240$  s were analyzed (n= 57 sessions). (D) Average median errors across  
718 all well-decoded sessions plotted against the position (left) and those for the locations  
719 encoded by GT, NRNG, and RW (right). \*  $P = 0.026$ , \*\*\*  $P < 0.0001$ ,  $F_{(1.312, 31.49)} = 8.14$ ; one-  
720 way ANOVA, n = 25 sessions.

721

722 **Figure 4. Experience-dependent consolidation of salience maps.** (A) Example  
723 hippocampal CA1 vPC maps imaged in two consecutive sessions in the early phase of the  
724 training. Maps shown on top, middle and bottom present cells identified in common in both  
725 sessions (Common cells), cells identified as vPCs in both sessions (Common vPCs), and  
726 cells identified as vPCs with stable ( $< 10$  cm difference) virtual place fields in both  
727 sessions (Stable vPCs), respectively. vPCs and non-vPCs are represented by filled circles  
728 of various colors and gray dots, respectively. The different colors of the filled circles  
729 represent different locations of the virtual place fields. The histogram shown at the bottom  
730 indicates the distributions of the stable vPCs against the track position. The green and red  
731 dashed lines delineate the positions of the landmark and reward delivery, respectively.  
732 The same convention applies to B. (B) vPC maps imaged in the late phase of training in  
733 the same animal as presented in a. (C) The fraction of common vPCs relative to the  
734 number of common cells identified in the two consecutive sessions that were compared.  
735 The X-axis indicates the earlier of the two sessions that were compared. (D) vPC stability  
736 calculated as the fraction of stable vPCs relative to the number of common vPCs identified  
737 in the two consecutive sessions that were compared. (E) Average vPC stability for the  
738 early (sessions 1 - 4, which indicates the earlier of the two sessions that were compared),  
739 middle (sessions 5 - 10) and late (sessions 11 - 14) phases of training. \* $P = 0.029$  vs.  
740 Early, \*\* $P = 0.0048$  vs. Early,  $F_{(2,11)} = 7.90$ , one-way ANOVA; n = 4, 6 and 4 session pairs.  
741 (F) The average fractions of stable vPCs relative to the number of common vPCs plotted  
742 against the track position. Values were calculated from data across all sessions and

743 averaged for 7 mice. The green and red dashed lines delineate the positions of the  
744 landmark and reward delivery, respectively. The areas shown in green and red indicate  
745 those that define gate and reward cells, respectively. (G) The average vPC stability for  
746 gate cells (GT), non-reward, non-gate vPCs (NRNG) and reward cells (RW).  $^{\#}P = 0.029$  vs.  
747 NRNG,  $^{\#\#}P = 0.0018$  vs. NRNG,  $F_{(1,202, 7.212)} = 13.9$ , one-way ANOVA,  $n = 7$  mice from 2  
748 groups. (H) The relationship between vPC stability and task performance. The X-axis  
749 presents the task performance of each mouse measured by the difference in the fraction of  
750 time spent running between the early (average of sessions 1 - 5) and late (average of  
751 sessions 11 - 15) phases of the training. The Y-axis presents the difference in vPC stability  
752 between the early and late phases of training.

753

754 **Figure 5. Formation, recruitment and stabilization of different vPC categories during**

755 **map establishment.** (A-C) Schematic diagrams of direct formation (A), lateral recruitment

756 (B) and selective consolidation models (C). In each diagram, four functional cell

757 categories, namely, reward cells (RWs, red), gate cells (GTs, green), non-reward, non-

758 gate vPCs (NRNGs, blue) and non-vPCs (NvPCs, gray), and the transitions between them

759 are defined. RWs, GTs and NRNGs constitute subcategories of vPCs and are shown

760 enclosed by a dashed line. The transitions relevant to each model are highlighted in black.

761 (D) Formation of different vPC categories from NvPCs. (left) A histogram showing the

762 distribution of vPCs that were NvPCs in the previous sessions against the track position.

763 The values were calculated from data across all sessions and averaged for 7 mice. For

764 comparison, the histograms shown in D, E and G-I are plotted on the left Y-axes on the

765 same scale. In addition, the histograms in G and I were scaled by their maximum values

766 and plotted in a light color on the right Y-axes. (right) The average cell density of each vPC

767 subcategory formed from NvPCs.  $^{\#}P = 0.023$  vs. NRNG,  $\chi^2_{(2)} = 8.00$ ; Friedman test,  $n = 7$

768 mice from 2 groups. (E) Elimination of different vPC categories into NvPCs. (left) A



769 histogram showing the distribution of vPCs that became NvPCs in subsequent sessions  
770 against the track position. (right) The average cell density of each vPC subcategory that  
771 became NvPCs in the subsequent sessions.  $^{###}P = 0.0099$  vs. NRNG,  $\chi^2_{(2)} = 8.86$ ;  
772 Friedman test,  $n = 7$  mice from 2 groups. (F) Net vPC formation. (left) A histogram of the  
773 difference obtained by subtracting the histogram in E from that in D. Note that this  
774 histogram only shows the distribution of locations for entry into and exit from the vPC  
775 populations and can have negative values for some locations. (right) The average cell  
776 density of the remaining vPCs classified by the vPC subcategories. (G) Transition and  
777 stability of the NRNGs. (left) A histogram showing the distribution of vPCs that were  
778 NRNGs in the previous sessions against the track position. (right) The average cell density  
779 of each vPC subcategory that was derived from NRNG. (H) Transition and stability of the  
780 GTs. (left) A histogram showing the distribution of vPCs that were GTs in the previous  
781 sessions against the track position. (right) The average cell density of each vPC  
782 subcategory that was derived from GTs.  $^{\#}P = 0.023$  vs. NRNG,  $\chi^2_{(2)} = 7.14$ , Friedman test,  
783  $n = 7$  mice from 2 groups. (I) Transition and stability of the RWs. (left) A histogram  
784 showing the distribution of vPCs that were RWs in the previous sessions against the track  
785 position. (right) The average cell density of each vPC subcategory that was derived from  
786 RWs.  $^{###}P = 0.0005$  vs. NRNG,  $\chi^2_{(2)} = 14.0$ , Friedman test,  $n = 7$  mice from 2 groups.

787

788 **Figure 6. Robust reorganization of salience maps induced by a conjunction of**  
789 **different kinds of salience.** (A) Design of the reward rearrangement task. Mice were first  
790 trained in the standard linear track that included a visual landmark (GT) and reward  
791 delivery (RW) at separate locations for 15 sessions (Pre, left). Once training was complete,  
792 the location of reward delivery was shifted to match the location of the visual landmark  
793 (GT+RW), and the mice were re-trained in this new arrangement for the following 5  
794 sessions (Rearr 1-5, right). (B) Examples of vPC maps imaged in the same animal in the

795 pre (session Pre -1), early (session Rearr 1) and late (session Rearr 5) phases of the  
796 reward rearrangement task (top). vPCs and non-vPCs (NvPC) are represented by filled  
797 circles of various colors and gray dots, respectively. The different colors of the filled circles  
798 represent different locations of the virtual place fields. Heat maps shown below the vPC  
799 maps are the distributions of virtual place fields of the corresponding sessions ordered by  
800 their positions (bottom). (C) Histograms indicating the distribution of vPCs with respect to  
801 the track position for pre (session Pre -2), early (session Rearr 1) and late (session Rearr  
802 5) phases of the rearrangement task. The average data from 7 mice are shown. For  
803 comparison, the histograms of the pre and early sessions were scaled by their maximum  
804 values to that of the late session and are plotted in light blue on their right Y-axes. The  
805 green, red and magenta dashed lines delineate the positions of the landmark, reward  
806 delivery and boundary of different wall patterns, respectively. The areas shown in green,  
807 red and magenta indicate those that define gate, reward and wall cells, respectively. (D)  
808 Hippocampal spatial representations as expressed by the fractions of gate cells (GT,  
809 green), non-reward, non-gate vPCs (NRNG, blue), reward cells (RW, red) and wall cells  
810 (WL, magenta) relative to the number of total vPCs identified in each session. Values were  
811 normalized to that obtained in the case of uniform distribution (i.e., 0.0125/bin), and values  
812 greater than 1 indicate that the locations are over-represented. (E) Average normalized  
813 fractions of GT (green), WL (magenta), NRNG (blue) and RW (red) for pre, early and late  
814 phases of the reward rearrangement (Ra) task. #<sup>a</sup>, P = 0.044 vs. NRNG Pre, ##<sup>b</sup>, P =  
815 0.0022 vs. NRNG Pre, F<sub>(1.433, 8.597)</sub> = 13.4; #<sup>c</sup>, P = 0.026 vs. NRNG Early, F<sub>(2.019, 12.11)</sub> =  
816 10.8; ##<sup>d</sup>, P = 0.0087 vs. NRNG Late, ##<sup>e</sup>, P = 0.0095 vs. NRNG Late, ##<sup>f</sup>, P = 0.0095 vs.  
817 NRNG Late, F<sub>(1.785, 10.71)</sub> = 18.3; \*g, P = 0.011, \*h, P = 0.011, F<sub>(1.511, 9.067)</sub> = 10.5; \*\*i, P =  
818 0.0099, \*\*j, P = 0.0041, F<sub>(1.672, 10.03)</sub> = 11.6; \*\*\*k, P = 0.0008, \*\*\*l, P = 0.0008, F<sub>(1.408, 8.446)</sub> =  
819 38.8; one-way ANOVA, n= 7 mice from 2 groups.

820

821 **Figure 7. vPC stability during reward rearrangement task.** (A) Example hippocampal  
822 CA1 vPC maps imaged in two consecutive sessions in the pre phase of the reward  
823 rearrangement task. Maps shown on top, middle and bottom present cells identified in  
824 common in both sessions (Common cells), cells identified as vPCs in both sessions  
825 (Common vPCs), and cells identified as vPCs with stable (< 10 cm difference) virtual place  
826 fields in both sessions (Stable vPCs), respectively. vPCs and non-vPCs are represented  
827 by filled circles of various colors and gray dots, respectively. The different colors of the  
828 filled circles represent different locations of the virtual place fields. The histogram shown at  
829 the bottom indicates the distributions of the stable vPCs against the track position. The  
830 green and red dashed lines delineate the positions of the landmark and reward delivery,  
831 respectively. The same convention applies to B and C. (B-C) Hippocampal CA1 vPC maps  
832 imaged in the early (B) and late (C) phase of training in the same animal as presented in  
833 A. (D) The average vPC stability for GT, NRNG and RW for pre, early and late phases of  
834 the reward rearrangement task. #<sup>a</sup>, P = 0.049 vs. NRNG Pre,  $\chi^2_{(2)} = 6.00$ ; #<sup>b</sup>, P = 0.033 vs.  
835 RW Pre, ##<sup>c</sup>, P = 0.0063 vs. RW Pre,  $\chi^2_{(2)} = 11.2$ ; \*\*d, P = 0.0040, \*e, P = 0.049,  $\chi^2_{(2)} =$   
836 11.1; \*\*f, P = 0.0040, \*g, P = 0.049,  $\chi^2_{(2)} = 11.1$ ; Friedman test, n = 7 mice from 2 groups.  
837

838 **Figure 8. Map plasticity is mediated by a dynamic interplay of stabilization,**  
839 **formation and recruitment of vPCs.** (A-i) Formation of different vPC categories from  
840 NvPCs. The histograms show the distributions of vPCs that were NvPCs in the previous  
841 sessions against the track position, and those for pre, early and late phases of the reward  
842 rearrangement task are shown from top to bottom. The values were calculated from data  
843 across all relevant sessions and averaged for 7 mice. The green, red and magenta dashed  
844 lines delineate the positions of the landmark, reward delivery and boundary of different  
845 wall patterns, respectively. The areas shown in green, red and magenta indicate those that  
846 define gate, reward and mid cells, respectively. (A-ii) Elimination of different vPC

847 categories into NvPCs. The histograms show the distributions of vPCs that became  
848 NvPCs in the subsequent sessions against the track position. (A-iii) Net vPC formation.  
849 The histograms of the differences were obtained by subtracting the histograms in A-ii from  
850 the corresponding ones in A-i. (A-iv) Transition and stability of the NRNGs. The histograms  
851 show the distributions of vPCs that were NRNGs in the previous sessions against the track  
852 position. (A-v) Transition and stability of the GTs. The histograms show the distributions of  
853 vPCs that were GTs in the previous sessions against the track position. (A-vi) Transition  
854 and stability of the RWs. The histograms show the distributions of vPCs that were RWs in  
855 the previous sessions against the track position. (B-i) Formation of different vPC  
856 categories from NvPCs. The average cell density of each vPC subcategory formed from  
857 NvPCs are shown for pre, early and late phases of the reward rearrangement task. The  
858 periods of reward rearrangement are shaded in gray. \*\*\*a,  $P = 0.0002$  vs. RW Pre, \*\*b,  $P =$   
859  $0.0015$  vs. RW Pre, \*\*\*c,  $P < 0.0001$  vs. GT Pre, ##d,  $P = 0.0055$ , ###e,  $P = 0.0005$ , ###f,  
860  $P < 0.0001$ , ###g,  $P < 0.0001$ ,  $F_{(2,12)} = 14.5$ , two-way ANOVA,  $n = 7$  mice from 2 groups.  
861 (B-ii) Elimination of different vPC categories into NvPCs.\*\*\*h,  $P = 0.0007$  vs. RW Pre, ###i,  
862  $P < 0.0001$ ,  $F_{(2,12)} = 8.01$ , two-way ANOVA,  $n = 7$  mice from 2 groups. (B-iii) Net vPC  
863 formation. The difference between the formation and elimination of each vPC subcategory  
864 are shown. \*\*j,  $P = 0.0019$  vs. RW Pre, \*k,  $P = 0.032$  vs. GT Early, #l,  $P = 0.011$ ,  $F_{(2,12)} =$   
865  $16.4$ , two-way ANOVA,  $n = 7$  mice from 2 groups. (B-iv) Transition and stability of the  
866 NRNGs. \*\*m,  $P = 0.0029$  vs GT early, ###n,  $P < 0.0001$ ,  $F_{(2,12)} = 5.22$ , two-way ANOVA,  $n$   
867  $= 7$  mice from 2 groups. (B-v) Transition and stability of the GTs. \*\*o,  $P = 0.0042$  vs. GT  
868 Early, ###p,  $P = 0.0005$ ,  $F_{(2,12)} = 7.18$ , two-way ANOVA,  $n = 7$  mice from 2 groups. (B-vi)  
869 Transition and stability of the RWs.\*\*\*q,  $P < 0.0001$  vs. RW Pre, \*\*\*r,  $P < 0.0001$  vs. RW  
870 Pre, ###s,  $P < 0.0001$ , #t,  $P = 0.036$ ,  $F_{(2,12)} = 4.71$ , two-way ANOVA,  $n = 7$  mice from 2  
871 groups. (C) A model for reorganization of the hippocampal salience map elicited by the  
872 rearrangement of reward. The key processes in each phase are shown in red.

873 Augmentation and reduction of the processes are shown with thicker and dashed lines,  
874 respectively. Selective consolidation of GT and RW plays a dominant role in establishment  
875 and maintenance of the salience map during training before the rearrangement (Pre, left).  
876 Immediately after reward arrangement, the fraction of vPCs decreases because of  
877 decreased RW formation and stabilization, and a subpopulation of RW move their fields to  
878 the new reward location (Early, middle). After a few sessions, the stability and formation of  
879 GT as well as recruitment from NRNG to GT increase (Late, right).

880

881 **Figure S1. Transgene expression in Thy1-G-CaMP7 transgenic mice.** (A) G-CaMP7  
882 expression (green) overlaid with parvalbumin (PV, left) or somatostatin (SOM, right)  
883 immunofluorescence (magenta) in the dorsal hippocampal CA1 area at 4 months of age.  
884 SO, stratum oriens; SP, stratum pyramidale; SR, stratum radiatum; Scale bar = 20  $\mu$ m. (B)  
885 Expression of G-CaMP7 (left) and DsRed2 (right) in a parasagittal section of the  
886 hippocampus at 1 month of age. DG, dentate gyrus; CA1, CA1 area of the hippocampus;  
887 CA3, CA3 area of the hippocampus; S, subiculum. Scale bar = 500  $\mu$ m. (C) Low  
888 magnification images of G-CaMP7 (left) and DsRed2 (right) expression in the visual cortex  
889 at 3 months of age. Scale bar = 200  $\mu$ m. (D) High magnification images of G-CaMP7  
890 expression in layer 2/3 (L2/3, left) and layer 5 (L5, right) in the visual cortex at 3 months of  
891 age. Scale bar = 20  $\mu$ m. (E-N) G-CaMP7 expression at 1 month of age in the olfactory  
892 bulb (E), amygdala (F), thalamus (G), midbrain (H, I), cerebellum (J, K), pons (L) and  
893 medulla (M, N). EP, external plexiform layer; Gl, glomerular layer; GrO, granule cell layer  
894 of the olfactory bulb; IP, internal plexiform layer; M, mitral cell layer; BLA, basolateral  
895 amygdala; LA, lateral amygdala; dLGN; dorsal lateral geniculate nucleus; SN, substantia  
896 nigra; IG, intermediate gray layer of the superior colliculus; SG; superficial gray layer of the  
897 superior colliculus; GrC, granule cell layer of the cerebellum; Mo, molecular layer; PC,  
898 Purkinje cell layer; WM, white matter; DCN, dorsal cochlear nucleus; IN, interposed

899 cerebellar nucleus; LN, lateral cerebellar nucleus; PN, pontine nucleus; MVN, medial  
900 vestibular nucleus; 4V, fourth ventricle; SpV, spinal trigeminal nucleus. Scale bar = 200  $\mu\text{m}$   
901 (left panels of E, F, G and H as well as I, L, M and N) or 100  $\mu\text{m}$  (right panels of E, F, G  
902 and H as well as J and K).

903

904 **Figure S2. Spatiotemporal deconvolution of calcium imaging data using a non-**  
905 **negative matrix factorization algorithm.** (A) A background-subtracted maximum  
906 intensity projection image that represents active cells in this example session. (B) Cell  
907 identification using the algorithm. In this session, 942 cells were identified. The contours of  
908 individual cells are shown by lines of different colors. (C) Time traces of fluorescence  
909 intensity (v, top) and inferred spike trains (u, bottom) of an example cell. The anatomical  
910 position of the cell is indicated in the inset by a red arrow. (D) Example of vPCs. Shown  
911 from top to bottom are a time series of the mouse's virtual position with the timing of  
912 cellular activity indicated by red dots (top), a time series of fluorescence intensity and  
913 inferred cellular activity (middle), a histogram of cellular activity plotted against the position  
914 in the virtual linear track (bottom left) and the anatomical position of the cell (bottom right).  
915 (E) Another example of vPCs. This cell was imaged in a different part of the same field of  
916 view as D and activated at a different location in the virtual linear track.

917

918 **Figure S3. Experience enhances more effective formation of vPCs.** (A) The fractions  
919 of vPCs were plotted against the corresponding fractions of time spent running for all  
920 sessions ( $n = 105$  sessions). The red line represents linear regression ( $r = 0.59$ ). (B, C)  
921 Bar graphs indicating mean fractions of time spent running and those of vPCs in the early,  
922 middle and late phases of training. The sessions in which mice ran 30-50% (B) and 50-  
923 70% (C) of the time were analyzed.  $\#P = 0.047$ ,  $F_{(2,29)} = 4.07$ ,  $n = 7, 12$  and  $13$  sessions,

924 one-way ANOVA. The comparison between Early vPC and Late vPC in 50-70% running  
925 exhibited a near-significant trend ( $P = 0.071$ ,  $F_{(2,19)} = 2.48$ ,  $n = 6, 8$  and  $8$  sessions).

926

927 **Figure S4. A delayed increase in vPCs that encode a location of a boundary of**  
928 **different wall patterns.** (A) The fractions of wall cells (magenta) in each session are  
929 expressed as normalized fractions relative to the uniform distribution of vPCs. The data on  
930 NRNG in Figure 2H are presented again in this plot for comparison (blue). (B) Average  
931 normalized fractions of wall cells (WL) for the early, middle and late phases of the training.  
932 The data on NRNG in Figure 2I are presented again in this graph for comparison (blue). \* $P$   
933 = 0.037,  $F_{(2,12)} = 4.79$ ,  $n = 5, 5$  and  $5$  sessions; one-way ANOVA,  $^{##}P = 0.0079$ ,  $U_{(5,5)} = 0$ ,  
934 vs. Late NRNG,  $n = 5$  and  $5$  sessions, two-tailed Mann-Whitney test.

935

936 **Figure S5. Alignment of cells across sessions.** (A) Image registration with or without  
937 the displacement estimated by two-dimensional correlation coefficients. A DsRed2  
938 reference image of the target session (top left) was overlaid with that of the source session  
939 (top center) without image displacement (top right). This placement resulted in global  
940 misalignment of cell positions between the target (red) and source (green) images. To  
941 correct this misalignment, two-dimensional correlation coefficients between the two images  
942 were calculated within a range of  $\pm 25 \times \pm 25$  pixel displacements (middle). The DsRed2  
943 image of the same target session (bottom left) was then overlaid with that of the source  
944 session (bottom center) shifted by the amount of displacement that provided the maximum  
945 correlation coefficient (bottom right). This procedure improved global image alignment, as  
946 shown by an increase in well-aligned pixels, represented in yellow in the overlaid image.  
947 (B) Cells overlaid without correcting image displacement. Cells in the target and source  
948 sessions are presented as red dots and blue circles, respectively. (C) Cell aligned after the  
949 correction of image displacement. Many cells in both images are now properly aligned,

950 and their local anatomical arrangements are mostly preserved. (D) Cell pairs that were  
951 considered to be the same cells are shown (see Methods for detailed criteria). (E) The  
952 average fractions of cells aligned between two consecutive sessions. Values are  
953 expressed relative to the number of total cells identified in the target sessions. The X-axis  
954 indicates the earlier of the two sessions that were compared. (F) The average two-  
955 dimensional correlation coefficients plotted against the session intervals between the two  
956 images compared. Data are presented as the mean  $\pm$  SD (n = 7 - 98 session pairs).

957

958 **Figure S6. The experience-dependent increase in vPC stability is not due to the**  
959 **increased number of vPCs.** (A) Average fractions of common vPCs relative to the  
960 number of total vPCs for the early, middle and late phases of training. #<sup>a</sup>, P = 0.029 vs.  
961 Early, ##<sup>b</sup>, P = 0.0075 vs. Early,  $F_{(2,11)} = 7.08$ ; one-way ANOVA, n= 4, 6 and 4 session  
962 pairs. (B) Average fractions of stable vPCs relative to the number of total vPCs. #<sup>a</sup>, P =  
963 0.015 vs. Early, ##<sup>b</sup>, P = 0.0037 vs. Early,  $F_{(2,11)} = 8.90$ ; one-way ANOVA, n= 4, 6 and 4  
964 session pairs.

965

966 **Figure S7. Stability and transition of vPCs and NvPCs across sessions.** (A) Two  
967 functional cell categories, virtual place cells (vPCs) and non-virtual place cells (NvPCs),  
968 and the stability and transition of each category between sessions of interest and their  
969 immediately successive sessions are shown in this model.  $P_{\text{vPC-vPC}}$  represents the  
970 probability that a vPC in one session remains a vPC in the next session, and  $P_{\text{vPC-NvPC}}$   
971 represents the probability that a vPC in one session becomes an NvPC in the next  
972 session. Similar conventions apply to  $P_{\text{NvPC-vPC}}$  and  $P_{\text{NvPC-NvPC}}$ . (B) Stability and  
973 transition of vPC and NvPC. The X-axis indicates the earlier of the two sessions that were  
974 compared. (C) The average probabilities of vPC stability ( $P_{\text{vPC-vPC}}$ ) and vPC formation ( $P_{\text{NvPC-vPC}}$ )  
975 for the early and late phases of training. \*\*<sup>a</sup>, P = 0.0046,  $t_{(6)} = 4.40$ ; \*\*<sup>b</sup>, P =



976 0.0086,  $t_{(6)} = 3.84$ ; #<sup>c</sup>,  $P = 0.044$ ,  $t_{(6)} = 2.55$ ; #<sup>d</sup>,  $P = 0.014$ ,  $t_{(6)} = 3.45$ ; unpaired two-tailed t-  
977 test,  $n = 4$  session pairs each.

978

979 **Figure S8. Behavior and vPC fractions during the reward rearrangement task. (A)**

980 Total distance traveled (Distance, left) and running speed (Speed, right). (B) The fraction  
981 of time spent running (Run period). (C) The fraction of vPCs. The periods during which the  
982 reward delivery was relocated are shaded in gray. In B and C, plots indicating average  
983 values for pre, early and late phases of re-training are shown on the right. \*\* $P = 0.0018$  vs.  
984 Pre,  $F_{(2,12)}=12.6$ , one-way ANOVA,  $n = 7$  mice from 2 groups.

985

986 **Figure S9. A subpopulation of cells that persistently encode the reward locations.**

987 The positions of virtual place fields of common vPCs in two consecutive sessions during  
988 the pre-training (A, Pre;  $n = 1106$  cells), before and after the reward rearrangement (B,  
989 Rearr;  $n = 462$  cells), and during the late phase of the reward rearrangement task (C, Late;  
990  $n = 1281$  cells) are displayed as two-dimensional plots. The X-axis and Y-axis indicate the  
991 positions of the earlier and later of the two sessions, respectively. Each dot represents the  
992 position of a cell's virtual place field, and cells from all mice and relevant sessions are  
993 shown. The red arrow in B indicates a cluster of cells that were active at the reward  
994 locations regardless of their absolute positions. The green and red lines delineate the  
995 positions of the landmark and reward delivery before the reward rearrangement,  
996 respectively. The blue diagonal line and the two flanking black dotted lines represent the  
997 range that defines stable vPCs.

998 **Methods**

999

1000 **Ethics statement**

1001 All experiments were conducted in accordance with institutional guidelines and  
1002 protocols approved by the RIKEN Animal Experiments Committee.

1003

1004 **Generation of Thy1-G-CaMP7 transgenic mice**

1005 The cDNA encoding G-CaMP7 (Ohkura et al., 2012) ligated to the coding sequence  
1006 of DsRed2 via a *Thosea asigna* virus-derived 2A peptide sequence (Sato et al., 2015) was  
1007 subcloned into the Xho I site of the modified mouse Thy-1.2 promoter vector (Feng et al.,  
1008 2000). The 8.7-kb DNA fragment was prepared by digestion with Not I and Pvu I restriction  
1009 enzymes and subsequent gel purification and injected into the pronuclei of 466 fertilized  
1010 eggs of C57BL/6J mice. From 32 offspring, 9 mice were identified as transgene positive,  
1011 and 6 exhibited transgene expression in the brain. One founder mouse that expressed the  
1012 transgene at a high level in the hippocampus was used for this study. Mice were  
1013 genotyped by PCR using the primers 5'-CTGCTGCCCGACAACCA-3' and 5'-  
1014 GTCGTCCTTGAAGAAGATGG-3', which provided a 465-bp product of the G-CaMP7  
1015 coding sequence from tail DNA samples of transgene-positive mice.

1016

1017 **Analysis of transgene expression**

1018 Thy1-G-CaMP7 transgenic mice were anesthetized deeply with Avertin and  
1019 perfused transcardially with phosphate-buffered saline (PBS), followed by 4%  
1020 paraformaldehyde (PFA) in PBS. Brains were removed and further fixed in 4% PFA at 4°C  
1021 overnight. Parasagittal sections were cut on a vibratome to a thickness of 100 µm. Low-  
1022 magnification fluorescent images of G-CaMP7 and DsRed2 (Figure 1D) were acquired  
1023 with a Keyence BZ-9000 epi-fluorescence microscope equipped with a 4x objective. For

1024 immunofluorescence labeling, coronal sections were cut on a vibratome to a thickness of  
1025 50  $\mu\text{m}$  and incubated with rabbit anti-calbindin D-28K (1:500, AB1778, Millipore, Billerica,  
1026 MA), rabbit anti-GAD65/67 (1:500, AB1511, Millipore), mouse anti-parvalbumin (1:1000,  
1027 clone PARV-19, P3088, Sigma, St. Louis, MO) or mouse anti-somatostatin (1:200, clone  
1028 SOM-018, GTX71935, Gene Tex, Irvine, CA) antibody diluted in PBS containing 2%  
1029 normal goat serum, 1% BSA, and 0.1% Triton X-100 at 4°C overnight, followed by Alexa  
1030 647-labeled goat anti-rabbit or anti-mouse IgG antibody (1:700, A-21245 or A-21236,  
1031 Thermo Fisher Scientific, Waltham, MA) diluted in the same buffer at room temperature for  
1032 1 h. Fluorescence images were obtained using an Olympus FV1000 or FV1200 laser-  
1033 scanning confocal microscope (Olympus, Tokyo, Japan) equipped with a 20x dry or a 60x  
1034 water immersion objective lens. The reproducibility of labeling patterns was confirmed in  
1035 two independent experiments.

1036

### 1037 **Surgery**

1038 Adult male Thy1-G-CaMP7 transgenic mice, at least 12 weeks old and weighing 28-  
1039 30 g at the beginning of surgery, were used for the experiments. The mice were  
1040 anesthetized with isoflurane in ambient air (3% induction, 1.5% maintenance) and placed  
1041 in a custom-made stereotaxic frame. To reduce secretions and brain edema, atropine (0.3  
1042 mg/kg, s.c.) and dexamethazone (2 mg/kg, s.c.) were administered prior to anesthesia. A  
1043 circular piece of scalp was removed, and the underlying bone was cleaned and dried.  
1044 Three small screws were then placed in the skull (two at the suture of the interparietal and  
1045 occipital bones and one on the right frontal bone) to provide anchors for the head plate. A  
1046 thin layer of cyanoacrylate was applied to provide a substrate to which the dental acrylic  
1047 could adhere.

1048 A stainless steel head plate (25 mm length, 4 mm width, 1 mm thickness) with a  
1049 wide circular opening (7 mm inner diameter and 10 mm outer diameter, the center is 2.5

1050 mm off relative to the middle of the long side of the plate) was affixed to the skull using  
1051 dental cement. The center of the opening was targeted at 2 mm posterior to the bregma  
1052 and 2 mm lateral to the midline in the left hemisphere. The cement was mixed with black  
1053 ink to block light entry from the LCD monitor into the microscope and placed onto the skull  
1054 such that it covered the entire skull, including the anchor screws, except for the area of  
1055 skull inside the opening of the head plate.

1056         Optical window preparation was performed as described previously with  
1057 modifications (Sato et al., 2016). A few days after the head plate surgery, a 2.5-mm-  
1058 diameter circular craniotomy was created on the skull overlying the dorsal hippocampus.  
1059 The dura was removed with forceps, and the overlying cortex was aspirated in a small  
1060 amount at a time using a blunted 25-gauge needle connected to a vacuum pump. This  
1061 step was continued with occasional irrigation with cortex buffer (123 mM NaCl, 5 mM KCl,  
1062 10 mM glucose, 2 mM CaCl<sub>2</sub>, 2 mM MgCl<sub>2</sub>, 10 mM HEPES, pH 7.4) until the white matter,  
1063 including the corpus callosum, was exposed. Then, the top-most layers of the white matter  
1064 were gently peeled aside by holding with the vacuum-connected blunted needle such that  
1065 its minimal thickness remained covering the dorsal surface of the hippocampus. To  
1066 minimize bleeding, aspiration was initiated from a cortical area devoid of large vessels,  
1067 and bleeding was treated immediately with a piece of gelatin sponge (Spongel, Astellas  
1068 Pharma, Tokyo, Japan) wetted with cortex buffer. An imaging window was then inserted to  
1069 mechanically support the cranial hole, its surrounding tissue and the hippocampal surface.  
1070 The imaging window consisted of a stainless steel ring (2.5 mm outer diameter, 2.2 mm  
1071 inner diameter and 1.0 mm height) with a round coverslip (2.5 mm diameter, 0.17 mm  
1072 thickness, Matsunami Glass Ind., Osaka, Japan) attached to the bottom using a UV-  
1073 curable adhesive (NOA81, Norland Products, Cranbury, NJ). To reduce brain movement  
1074 during imaging, a small disk of medical grade clear silicone sheeting (0.13 mm thickness,  
1075 20-10685, Invotec International, Jacksonville, FL) was attached to the surface of the

1076 coverslip facing the hippocampal tissue (Mower et al., 2011). When the window was  
1077 positioned, the bottom coverslip was approximately parallel relative to the head plate, and  
1078 the hippocampal surface was clearly visible through the bottom coverslip without any trace  
1079 of bleeding. The upper rim was then cemented to the skull with dental acrylic.

1080 After surgery, a metal cover (0.3 mm thickness) was screwed onto the upper  
1081 surface of the head plate to protect the imaging window from dust. The mice were placed  
1082 in a warmed chamber until they fully recovered from anesthesia and were then returned to  
1083 their home cages. They were housed for at least 4 weeks of postoperative recovery before  
1084 the start of handling.

1085

### 1086 **Virtual reality (VR) set-up**

1087 A VR system with an air-supported spherical treadmill for head-fixed mice was  
1088 constructed as described previously (Sato et al., 2017). A 20-cm-diameter Styrofoam ball  
1089 placed inside the bowl provided a freely rotating surface on which the mouse stood. The  
1090 mouse was positioned near the top of the ball with its head fixed via the steel head plate  
1091 that was screwed into a rigid cross bar and posts. A single wide-screen 23" LCD display  
1092 (Dell U2312, Round Rock, TX) placed 30 cm in front of the mice presented VR scenes  
1093 rendered by OmegaSpace 3.1 (Solidray Co. Ltd., Yokohama, Japan) running on a  
1094 Windows 7 computer in 81° horizontal and 51° vertical fields of view. The LCD monitor  
1095 was large enough to cover the major part of the mouse's binocular and monocular visual  
1096 fields (Sato and Stryker, 2008). The use of a single LCD monitor for VR presentation  
1097 effectively elicits visual cue-based virtual navigation behavior in head-fixed mice  
1098 (Youngstrom and Stowbridge, 2012; Sato et al., 2017).

1099 The movement of the ball was measured with a USB optical computer mouse  
1100 (G400, Logitech, Newark, CA) via custom driver and LabVIEW software (National  
1101 Instruments, Austin, TX). The optical mouse was positioned in front of the mouse and at

1102 the intersection of the mouse's sagittal plane and the equator of the ball. The signals along  
1103 the horizontal axis (aligned parallel to the mouse's sagittal plane) generated by the running  
1104 of the head-fixed mouse was used to compute rotational velocity in the forward-backward  
1105 direction. This velocity signal was converted into analog control voltages (0-5 V) via a D/A  
1106 converter and fed to a USB joystick controller (BU0836X, Leo Bodner, Northamptonshire,  
1107 UK) connected to the OmegaSpace computer to move the mouse's position in VR.

1108 Water rewards (5  $\mu$ L/reward) were delivered by a microdispenser unit (O'Hara & Co.,  
1109 Ltd., Tokyo, Japan) attached to a water-feeding tube positioned directly in front of the  
1110 mouse's mouth. The unit was triggered upon reward events in VR by 5 V TTL signals  
1111 generated by an OmegaSpace script via a USB-connected D/A device (USB-6009,  
1112 National Instruments). The behavioral parameters, such as the mouse's location in the  
1113 virtual environment, the trigger signals for water rewards and the rotational velocity signals  
1114 of the spherical treadmill, were recorded at 20-ms intervals using custom software in  
1115 LabVIEW. The TTL signals for each frame sent by the microscope computer were  
1116 recorded with the behavioral data to synchronize the imaging and behavioral data.

1117

## 1118 **Behavior**

1119 At least 5 days before the start of behavioral training, mice implanted with the head  
1120 plate and the imaging window were acclimated to handling and the Styrofoam ball. During  
1121 this pre-training session, mice were handled by an experimenter for 5-10 min and then  
1122 allowed to move freely on the top of the ball, which was rotated manually by the  
1123 experimenter for another 5-10 min. The procedure was performed once a day and  
1124 repeated for at least 3 days. The mice were then subjected to a water restriction schedule  
1125 2-3 days before start of the behavioral training. Body weight and general appearance were  
1126 checked daily to ensure that the animals maintained at least ~85% of their pre-surgery  
1127 body weight and exhibited no signs of abnormal behavior throughout the study. Mice were

1128 housed in a group of one to four per cage in 12 h-12 h light-dark cycle (with lights on at 6  
1129 pm and off at 6 am on the next day). Experiments were performed during the dark phase  
1130 of the cycle to enhance the locomotion of the mice.

1131 The virtual endless linear track was created using an editor function of  
1132 OmegaSpace. The mouse started at the origin of the virtual linear track segment and ran  
1133 through the track unidirectionally with visual feedback rendered by OmegaSpace. The  
1134 track segment was 100 cm long, measured as the number of rotations of the ball required  
1135 to move from one end of the track to the other times the circumference of the ball. The  
1136 mouse moved only one-dimensionally along the midline of the track with its view angle  
1137 fixed toward the direction of moving. Different patterns were placed on the walls of each  
1138 track subsegment as follows: vertical white and black stripes for 0-25 cm; horizontal white  
1139 and black stripes for 25-50 cm; black dots on a white background for 50-100 cm. The floor  
1140 was patterned with white grids on a black background. The space above the track was  
1141 colored black. A green gate was placed as a salient landmark at 25 cm from the origin.  
1142 Water rewards were delivered when the mouse reached a reward point located 75 cm  
1143 from the origin. This reward point was located in the middle of a track zone with a certain  
1144 wall pattern (i.e., black dots on white background) and not denoted with other salient visual  
1145 cues. Upon reaching the other end of the segment, the mouse's virtual position was  
1146 transferred back to the origin, and the same segment of the linear track was presented  
1147 again. The approaching track segment next to the current one was always rendered on the  
1148 monitor, so the mouse could see that the virtual linear track was infinitely long.

1149 The mice underwent a total of 15 training sessions in the above task, with 1-2  
1150 sessions per day. Each session was 10 min long. When 2 sessions were performed in one  
1151 day, within-day intervals were at least 4 h, and the mice were returned to their home cages  
1152 between the sessions. The entire training period from the first to the last sessions was  $225 \pm 8$  h (mean  $\pm$  SD,  $n = 7$  mice). The mouse was lightly anesthetized with isoflurane to  
1153

1154 detach the metal window cover screwed onto the head plate and clean the imaging  
1155 window before being placed into the VR apparatus. The head was then fixed to the  
1156 crossbar above the ball via the head plate and we waited approximately 20 min until the  
1157 mouse kept on the ball in darkness recovered fully from the anesthesia. During the  
1158 behavioral session, the animal was allowed to behave freely in the head-fixed  
1159 arrangement. G-CaMP7 fluorescence in hippocampal CA1 pyramidal neurons was  
1160 simultaneously imaged as described below.

1161 For the reward rearrangement task, mice first underwent 15 training sessions in the  
1162 virtual linear track as described above. The mice were further trained for the following 5  
1163 sessions (Rearrangement 1-5) in the same virtual linear track except that the location of  
1164 reward delivery (75 cm from the origin) was shifted to match the location of the landmark  
1165 (25 cm from the origin). Data obtained from the last 4 sessions of the initial 15 training  
1166 sessions before the shift (Sessions 12 through 15, also referred to as Pre -4 through -1)  
1167 were analyzed as pre-rearrangement baseline sessions. The first rearrangement sessions  
1168 were performed immediately after the last baseline sessions without releasing the mice  
1169 from head fixation.

1170

## 1171 **Imaging**

1172 Imaging was performed using a Nikon A1MP (Nikon, Tokyo, Japan) equipped with a  
1173 16x, NA 0.8 water immersion objective lens. The microscope was controlled with Nikon  
1174 NIS-elements software. G-CaMP7 and DsRed2 were excited using a Ti-sapphire laser  
1175 (MaiTai DeepSee eHP, Spectra-Physics, Santa Clara, CA) at 910 nm. Typical laser power  
1176 was approximately 40 mW at the objective lens. G-CaMP7 fluorescence was separated  
1177 using a 560-nm dichroic mirror and collected with an external GaAsP photomultiplier tube  
1178 (10770PB-40, Hamamatsu Photonics, Hamamatsu, Japan) mounted immediately above  
1179 the objective lens. The calcium-insensitive DsRed2 fluorescence, which helped to identify



1180 G-CaMP7-labeled pyramidal neurons, was simultaneously imaged and recorded using  
1181 another GaAsP photomultiplier tube. The DsRed2 images were checked by the  
1182 experimenter for the on-site assessment of the quality of image acquisition but not used for  
1183 off-line quantitative image analysis, except for image alignment across sessions (Figure  
1184 S5).

1185 To image G-CaMP7-labeled CA1 pyramidal neurons, the microscope was focused  
1186 at a depth of approximately 150  $\mu\text{m}$  from the hippocampal surface. To prevent the entry of  
1187 light from the LCD monitor into the microscope, a small sheet of aluminum foil was  
1188 wrapped around the objective lens, so the foil completely covered the space between the  
1189 objective and the skull. Images of 512 x 512 pixels were acquired at a rate of 15 frames  
1190 per second using a resonant-galvo scanner mounted on the microscope. Each imaging  
1191 session was 10 min long. The size of the field of view was 532 x 532  $\mu\text{m}$ . In repeated  
1192 chronic imaging, previously imaged cell populations usually re-appeared at similar depths  
1193 in new sessions. We took reference images of DsRed2 fluorescence at the beginning of  
1194 each session to confirm that the reference image of the current session was very similar to  
1195 that of the previous session by ensuring that blood vessels and neurons arranged in  
1196 unique patterns appeared in the same parts of the two images.

1197

## 1198 **Image analysis**

1199 Each frame of a G-CaMP7 time-lapse movie was aligned to an average  
1200 fluorescence image of the movie for motion correction using the TurboReg ImageJ plug-in.  
1201 The registered movie was then denoised by a spatio-temporal median filter. This  
1202 preprocessed movie  $f(t,x)$  was reconstituted to the sum of fluorescence intensity of  
1203 individual cells using a modified non-negative matrix factorization algorithm, as described  
1204 in detail elsewhere (Vogelstein et al., 2010; Pnevmatikakis et al., 2016; Takekawa et al.,  
1205 2017). Briefly, this algorithm assumes that the fluorescence intensity of each cell can be

1206 deconvoluted to the spatial filter  $a_c(x)$ , which represents the position and shape of the cell,  
1207 and the time variation  $v_c(t)$  derived from spiking activities  $u_c(t)$ :

$$f(t, x) \sim N(a_0(x) + v_0(t) + \sum_c a_c(x)v_c(t), \sigma^2)$$

1208 where  $a_0$ ,  $v_0$  are baselines, and  $\sigma^2$  is intensity of Gaussian noise. As is the case in cell  
1209 identification using independent component analysis (Mukamel et al., 2009), this algorithm  
1210 preferentially detects cells that change their fluorescence intensities over time (“active  
1211 cells”) because cells that barely do so are regarded as being near baseline. Each spike  
1212 derives the transient elevation of fluorescence intensity with a double-exponential shape:

$$v_c(t) = \sum_{t'=1}^t \left( \exp\left(-\frac{t-t'}{\tau_1}\right) - \exp\left(-\frac{t-t'}{\tau_2}\right) \right) u_c(t')$$

1213  
1214 The exponential rise and decay time constants  $\tau_1 = 0.09$  and  $\tau_2 = 0.261$ , respectively, were  
1215 obtained by curve fitting of actual traces of cellular calcium transients in G-CaMP7-  
1216 expressing CA1 pyramidal neurons in Thy1-G-CaMP7 mice *in vivo*. Spatial filters and  
1217 spike timings were estimated by two iterative steps. In the first step, we prepared tentative  
1218 spatial filters and estimated spike trains corresponding to respective filters by a least-  
1219 squares approach with a non-negative restraint condition. Subsequently, spatial filters  
1220 were estimated using the least-squares method on the condition that the estimated spike

$$f(t, x) \sim N(a_0(x) + v_0(t) + \sum_c a_c(x)v_c(t), \sigma^2)$$

1221 trains were feasible. In addition, we introduced L1 sparse regularization derived from priors  
1222 that represented the typical cell size and spike frequency. To determine the mutual  
1223 relationship between  $a$  and  $u$ , a regularized term was also introduced to the model. This  
1224 condition guaranteed the uniqueness of the scale of  $a$ ,  $u$  and  $v$ . As a consequence,  $a$ ,  $u$   
1225 and  $v$  are presented in arbitrary units, while the product of  $a$  and  $v$  corresponds to the  
1226 observed data.

1227 In practice, 512 x 512 pixel image data were divided into 4 x 4 of 128 x 128 pixel  
1228 subareas with 32-pixel overlap regions. Each subarea was analyzed with the above  
1229 algorithm, and the results were combined to cover the whole image area. After the initial  
1230 calculation, the morphology of each spatial filter was defined as the region above 0.2 times  
1231 its peak value, and the position of the filter was defined by its weighted centroid. We then  
1232 removed the following filters as those that did not represent complete single pyramidal cell  
1233 morphology: (1) filters whose areas were smaller than 25 pixels, (2) filters whose areas  
1234 were larger than 400 pixels, (3) filters located on the edge of the image, (4) filters whose  
1235 heights or widths were greater than 64 pixels because they often contained structures of  
1236 multiple cells, and (5) smaller filters in filter pairs whose distances were closer than 10  
1237 pixels (10.4  $\mu\text{m}$ ) and whose temporal correlation coefficients of activities were greater than  
1238 0.3 because they were considered to be derived from the same cell.

1239 After those non-cell filters were removed, we recalculated the activity time series for  
1240 the new filter set. Visual inspection confirmed that nearly all active cells that were  
1241 represented in a background-subtracted maximum-intensity projection image were  
1242 identified with this procedure (Figure S2A-B). All images of the entire session, regardless  
1243 of the mouse's behavioral state, were used for this image analysis. The average number of  
1244 cells identified from a movie of a session was  $900 \pm 246$  (mean  $\pm$  SD,  $n = 105$  sessions).

1245

### 1246 **Analysis of virtual place fields**

1247 Place fields were calculated using cellular activity during movement periods. We  
1248 defined these periods as the time when the mouse moved at a speed of  $> 0.5$  cm/s  
1249 continuously for a duration of  $> 2$  s to reject irrelevant movements, such as grooming and  
1250 jittering on the ball. We divided the entire virtual linear track segment into 80 bins (bin size  
1251 = 1.25 cm) and created a histogram of neuronal activity versus track position for each cell.  
1252 The activity events were defined by binarizing the time series of inferred spike activity  $u$  at

1253 a threshold of 0.1, which was empirically determined to remove baseline noise. The counts  
1254 of the histogram were then divided by the mouse's occupancy time at each bin, and the  
1255 resultant place fields were Gaussian-smoothed (Gaussian window size = 6.25 cm) and  
1256 normalized to the maximum values. To test the significance of virtual place-related activity,  
1257 we calculated the mutual information content between neuronal activity and the mouse's  
1258 virtual location for each cell (Markus et al., 1994; Ziv et al., 2013). We compared this value  
1259 to a distribution of mutual information content calculated using 1000 randomly permuted  
1260 data for the same cell. The permutation was conducted by rotating the activity event time  
1261 series by a random amount relative to the time series of the mouse's virtual positions.  
1262 Cells were considered to be virtual place cells (vPCs) if their overall activity rates within the  
1263 session were no less than 0.1 events/s and their mutual information contents in the real  
1264 data were greater than the 95th percentile of the values obtained from the randomly  
1265 permuted data. We defined the position of the virtual place field of each vPC by the  
1266 position of the peak of the field. A vPC was considered to be a "gate cell", "reward cell" or  
1267 "wall cell" if its virtual place field position was 17.5-32.5, 75-95 or 47.5-55 cm from the  
1268 origin of the track segment. vPCs with virtual place field positions outside the above zones  
1269 were categorized as "non-reward, non-gate vPCs." The vPC formation factor was defined  
1270 by the slope of a least-squares regression line fitted to a plot of the fraction of vPCs  
1271 against the fraction of time spent running, which contained data points from all animals in  
1272 the session of interest. The linear regression model included no constant term under the  
1273 assumption that no vPCs were formed without running in each session. When calculating  
1274 the fractions of gate cells, reward cells and non-reward non-gate vPCs relative to the  
1275 number of total vPCs, data from sessions with at least 35 total vPCs ( $n = 93$  sessions)  
1276 were used to avoid the effects of improperly large or small fractions caused by small cell  
1277 numbers.

1278

## 1279 **Bayesian decoding**

1280 Bayesian probability-based reconstruction of the subject's trajectory from imaging  
1281 data was conducted essentially as described by Zhang et al. (Zhang et al., 1998; Ziv et al.,  
1282 2013). We computed  $P(\mathbf{x}|\mathbf{n})$ , the conditional probability for the subject to be at location  $\mathbf{x}$   
1283 given the neuronal activity  $\mathbf{n}$  occurred within a time window as follows.  $P(\mathbf{x})$ , the  
1284 unconditional probability for the subject to be at position  $\mathbf{x}$  was calculated from the dwell  
1285 time distribution at each spatial bin (bin size = 1.25 cm).  $P(\mathbf{n}|\mathbf{x})$ , the conditional probability  
1286 for neuronal activity  $\mathbf{n}$  to occur given the subject is at position  $\mathbf{x}$ , was computed using  $f_i(\mathbf{x})$ ,  
1287 the spatial map of neuronal activity of cell  $i$  at position  $\mathbf{x}$ , under the assumption that  
1288 occurrence of each  $\text{Ca}^{2+}$  transient is statistically independent as well as that vPCs are  
1289 independent of each other (Zhang et al., 1998; Ziv et al., 2013). Time-varying activity  
1290 traces containing  $\text{Ca}^{2+}$  transients were transformed into binarized vectors of the neuronal  
1291 activity (time step = 67 ms), in which 1 and 0 represent the presence and absence of a  
1292  $\text{Ca}^{2+}$  transient, respectively, and these vectors were binned in 200 ms bins for probability  
1293 calculations.  $P(\mathbf{n})$ , the probability for neuronal activity  $\mathbf{n}$  to occur, was estimated by  
1294 normalizing  $P(\mathbf{x}|\mathbf{n})$  by the condition that the sum of  $P(\mathbf{x}|\mathbf{n})$  along  $\mathbf{x}$  is equal to 1 (Zhang et  
1295 al., 1998). The peak position of the resultant probability distribution of  $P(\mathbf{x}|\mathbf{n})$ , computed  
1296 using the above conditional and unconditional probabilities by Bayes' theorem, was  
1297 regarded as the reconstructed position of the subject and the entire trajectory was  
1298 obtained by sliding the time window ahead. Estimation error was calculated as the  
1299 difference between the real and the reconstructed positions. Data from the sessions with a  
1300 running time  $\geq 240$  s were used for the reconstruction ( $n=57$  sessions). We trained the  
1301 decoder with the subject's observed virtual positions and activities of all vPCs during the  
1302 first 150 s of the running period and estimated the trajectory for the following 90 s running  
1303 time of the same sessions using the corresponding vPC activities. The sessions with  
1304 average median errors across all positions less than 10 cm were classified as well-

1305 decoded sessions (n= 25 sessions), and the errors of these sessions were then averaged  
1306 separately for the locations encoded by GT, NRNG, and RW cells for comparison.

1307

### 1308 **Alignment of cells across sessions and analysis of cell transitions**

1309 To find a population of the same cells in images that were acquired in two different  
1310 sessions, we first estimated the extent of overall image displacement that existed between  
1311 the two image datasets. We searched for a peak in the two-dimensional correlation  
1312 coefficient calculated between the two DsRed2 reference images obtained at the  
1313 beginning of each session within a range of a 25 x 25 pixel (26.0 x 26.0  $\mu\text{m}$ ) displacement  
1314 in the x and y dimensions (Figure S5A). All compared image pairs displayed a peak within  
1315 this range (average displacement in the x dimension,  $5.9 \pm 4.5 \mu\text{m}$ ; average displacement  
1316 in the y dimension,  $4.7 \pm 4.2 \mu\text{m}$ ; average peak correlation coefficient  $0.77 \pm 0.09$ , mean  $\pm$   
1317 SD, n = 98 image pairs). During the calculation of two-dimensional correlation coefficients,  
1318 the image of one session (the “source” session) was systematically shifted relative to that  
1319 of the other session (the “target” session). The map of the coordinates of all cell positions  
1320 in the target session was then overlaid with that of the source session, shifted by the  
1321 amount of the estimated displacement (Figure S5A). The cell closest to each cell in the  
1322 target session was searched in the displaced source session map, and the cell that was  
1323 found was regarded provisionally to be the same cell if they were separated by 5 pixels  
1324 (5.2  $\mu\text{m}$ ) or less. Cells that were unable to find the closest cells within this range were  
1325 rejected from the subsequent analysis. After finding the provisional counterparts in the  
1326 displaced source session map, the same procedure was repeated for the cells in the  
1327 displaced source session map to conversely find their closest partners in the target  
1328 session. This step helped remove cell pairs that were redundantly assigned (e.g., two  
1329 different cells in one session falsely assigned to the same single cell in the other session)  
1330 and the resultant cell pairs that had mutually unique correspondence were considered to

1331 be the pairs that represented the same cells (termed hereafter “common cells”). When  
1332 comparing vPC maps, common vPCs were defined as a subset of common cells that were  
1333 identified as significant vPCs (see above) in both consecutive sessions. Stable vPCs were  
1334 defined as a subset of common vPCs with virtual place field positions in the consecutive  
1335 sessions that were close to each other (i.e., virtual place field distance < 10 cm). The  
1336 stability and transition probabilities of vPCs and non-vPCs (NvPCs) (Figure S7) were  
1337 calculated as follows. First, we identified a population of common cells that belonged to  
1338 the cell category of interest in the reference session N and then examined the category  
1339 into which each of them was classified in the subsequent session N+1. The probability of  
1340 transition from category A in session N to category B in session N+1,  $P_{A-B}$ , was calculated  
1341 by dividing the number of cells that belonged to category A in session N and became a cell  
1342 of category B in session N+1 by the total number of cells that belonged to category A in  
1343 session N. The probability of stability was calculated similarly by considering it as a  
1344 process of transition to the same category. The analysis of formation, recruitment and  
1345 stabilization of vPCs (Figures 5 and 8) was conducted similarly, except that cells were  
1346 classified into four categories in the reference session N, and the position of the virtual  
1347 place field of each cell was tracked in the subsequent session N+1. The results are  
1348 expressed as the cell density rather than probabilities to show the relative contributions of  
1349 the different cell categories.

1350

## 1351 **Statistics**

1352 Data are expressed as means  $\pm$  SEM unless stated otherwise. When only two  
1353 groups were compared, two-sided Student’s t-tests were used if the variances of the two  
1354 groups were similar. Otherwise, two-tailed Mann-Whitney tests were used. When more  
1355 than two groups were compared, analysis of variance (ANOVA) was used if variances of  
1356 the groups compared were similar. Otherwise, a non-parametric version of ANOVA

1357 (Friedman test) was used. In both parametric and non-parametric ANOVA, P-values were  
1358 adjusted for post hoc multiple comparisons. Exact P-values are shown unless  $P < 0.0001$ .  
1359 Statistical tests were performed using GraphPad Prism Version 6.05 (GraphPad Software,  
1360 Inc., La Jolla, CA).

1361

## 1362 **References for Methods**

- 1363 Feng, G., Mellor, R. H., Bernstein, M., Keller-Peck, C., Nguyen, Q. T., Wallace, M.,  
1364 Nerbonne, J. M., Lichtman, J. W., and Sanes, J. R. (2000). Imaging neuronal subsets  
1365 in transgenic mice expressing multiple spectral variants of GFP. *Neuron* 28, 41–51  
1366 (2000).
- 1367 Manita, S., Suzuki, T., Homma, C., Matsumoto, T., Odagawa, M., Yamada, K., Ota, K.,  
1368 Matsubara, C., Inutsuka, A., Sato, M., et al. (2015). A Top-Down Cortical Circuit for  
1369 Accurate Sensory Perception. *Neuron* 86, 1304–1316.
- 1370 Markus, E.J., Barnes, C.A., McNaughton, B.L., Gladden, V.L., and Skaggs, W.E. (1994).  
1371 Spatial information content and reliability of hippocampal CA1 neurons: effects of  
1372 visual input. *Hippocampus* 4, 410–421.
- 1373 Mower, A.F., Kwok, S., Yu, H., Majewska, A. K., Okamoto, K. I., Hayashi, Y., and Sur, M.  
1374 (2011). Experience-dependent regulation of CaMKII activity within single visual cortex  
1375 synapses in vivo. *Proc. Natl. Acad. Sci. U.S.A.* 108, 21241–21246.
- 1376 Mukamel, E.A., Nimmerjahn, A., and Schnitzer, M.J. (2009). Automated Analysis of  
1377 Cellular Signals from Large-Scale Calcium Imaging Data. *Neuron* 63, 747–760 .
- 1378 Sato, M., and Stryker, M.P. (2008). Distinctive features of adult ocular dominance  
1379 plasticity. *J. Neurosci.* 28, 10278–10286.
- 1380 Sato, M., Kawano, M., Yanagawa, Y., and Hayashi, Y. (2016). *In vivo* two-photon imaging  
1381 of striatal neuronal circuits in mice. *Neurobiol. Learn. Mem.*, 135, 146-151.



- 1382 Youngstrom, I. A. and Stowbridge, B. W. (2012). Visual landmarks facilitate rodent spatial  
1383 navigation in virtual reality environments. *Learn. Mem.* 19, 84–90.

### A Direct formation

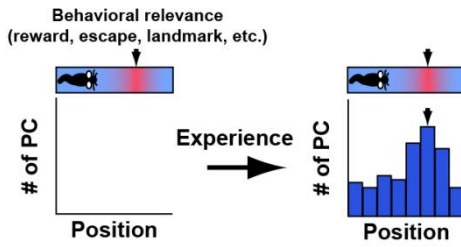

### B Lateral recruitment

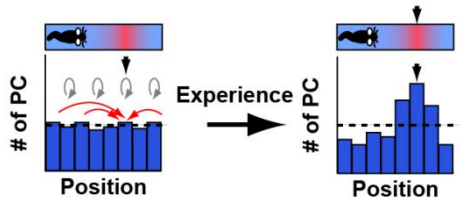

### C Selective consolidation

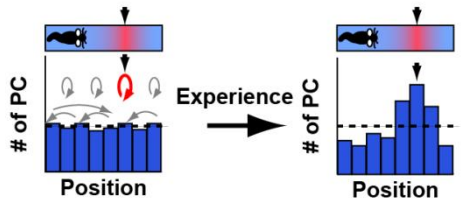

### D

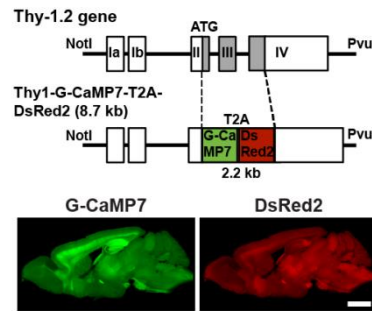

### E

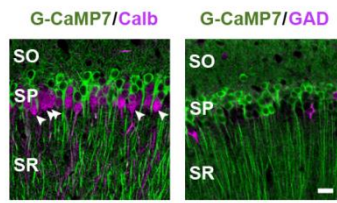

### F

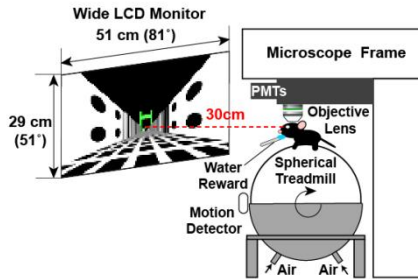

### G

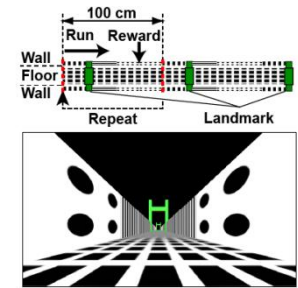

### H

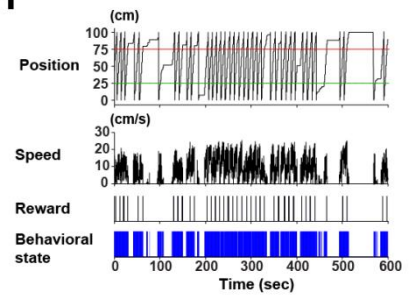

### I

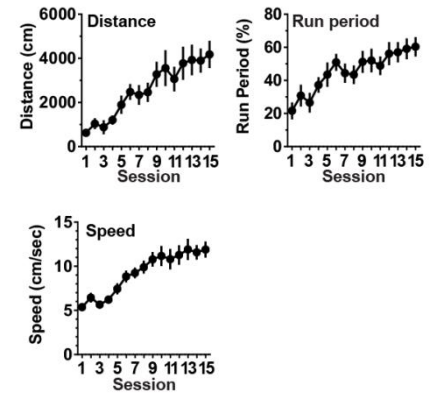

Figure 1  
Sato et al.

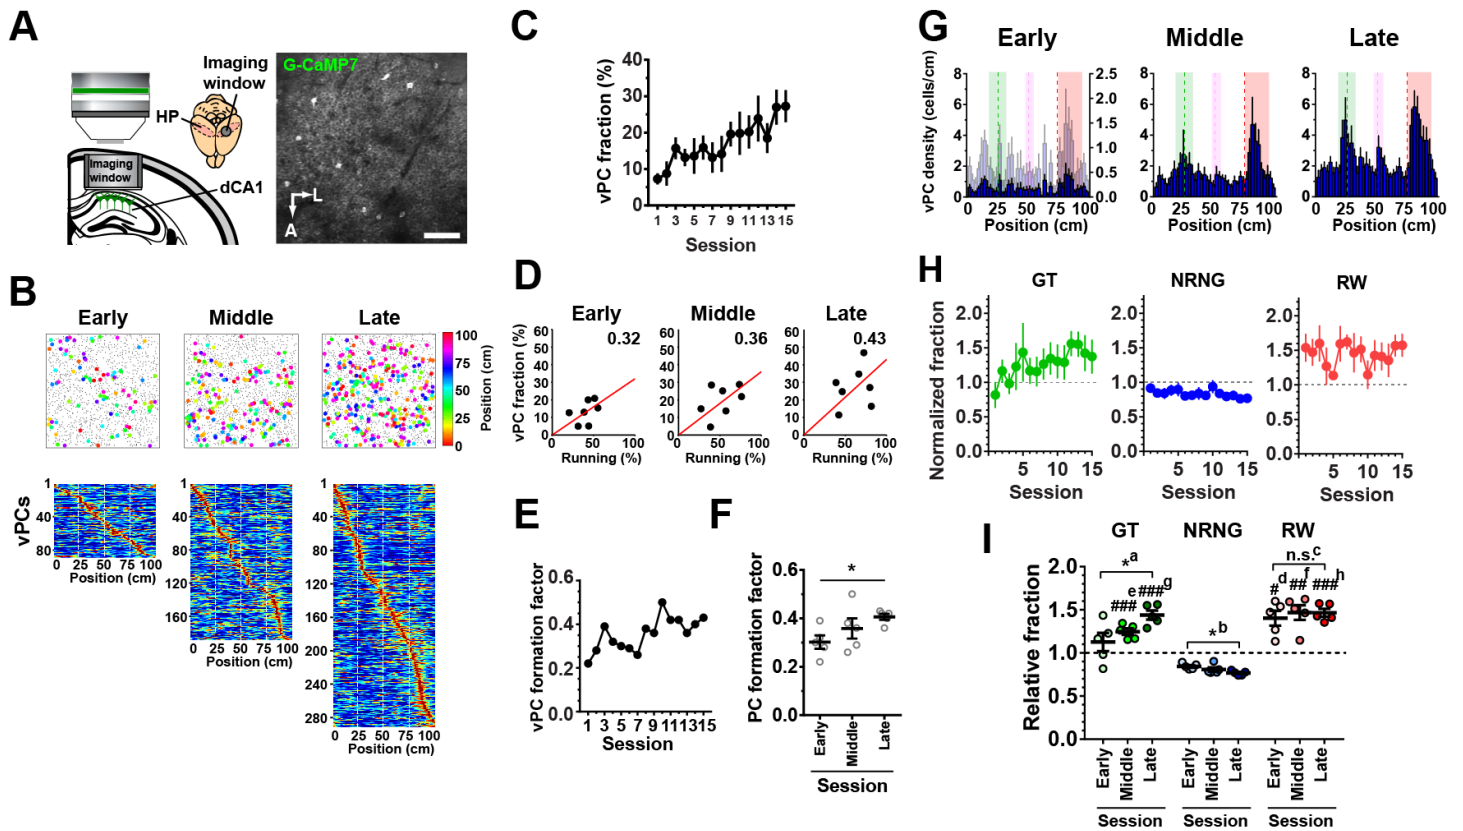

Figure 2  
Sato et al.

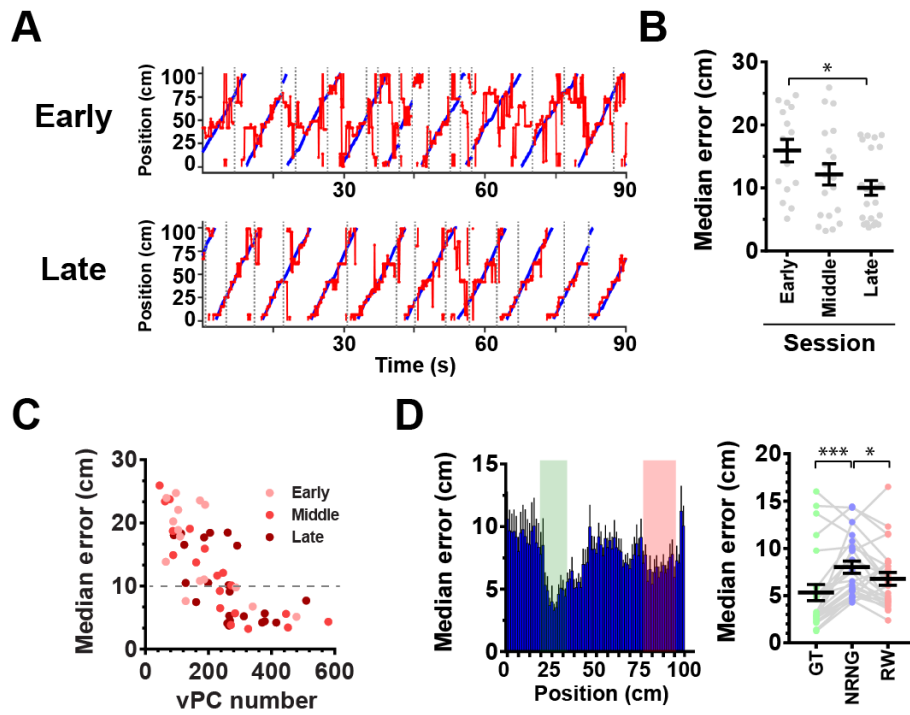

Figure 3  
Sato et al.

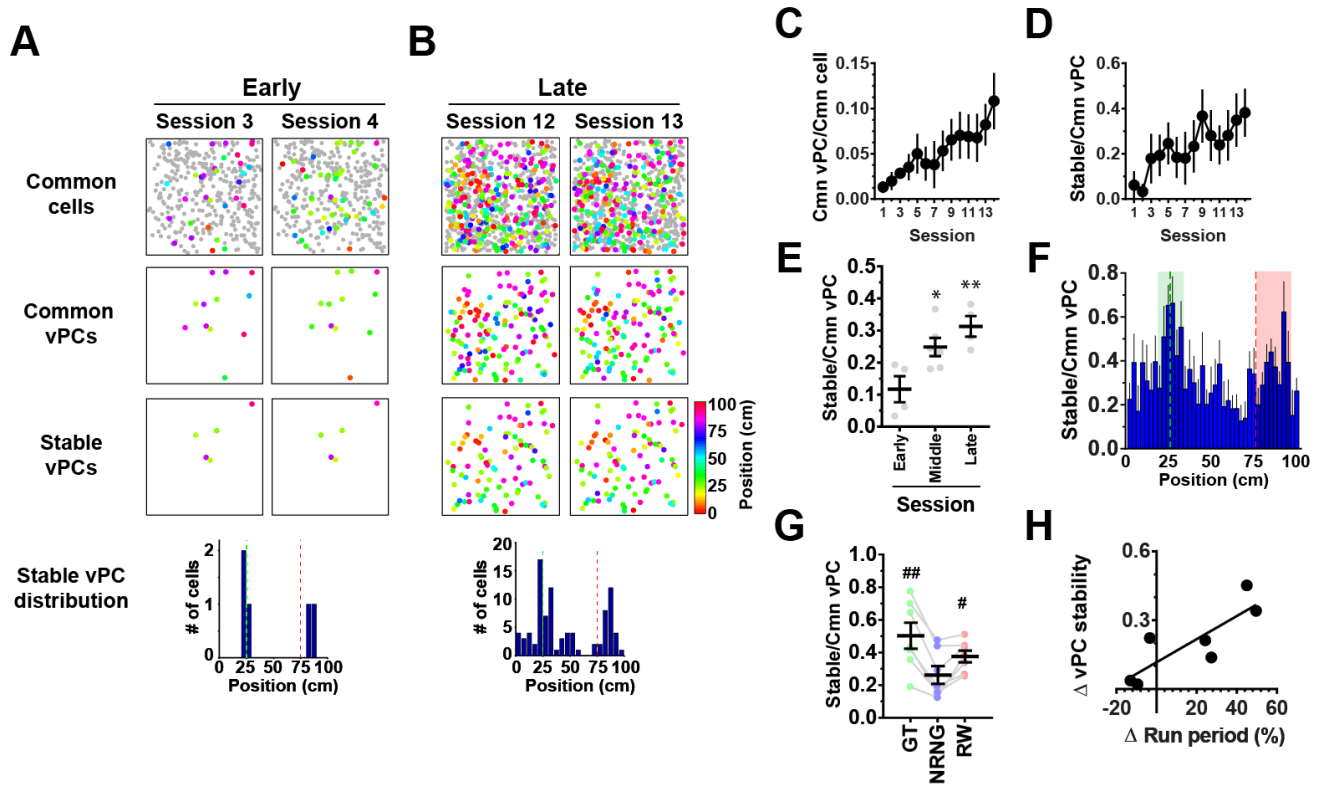

Figure 4  
Sato et al.

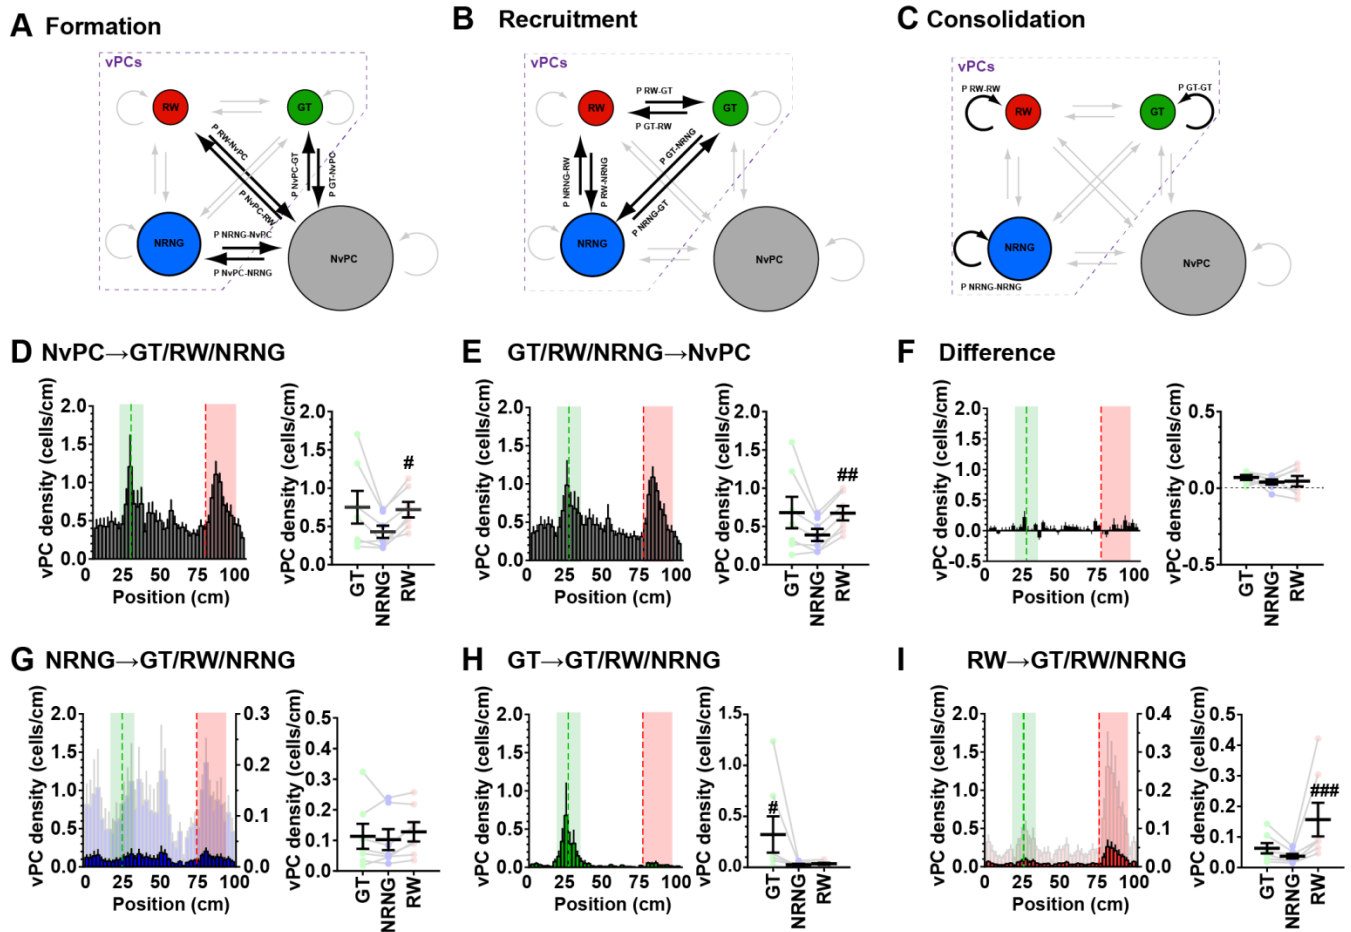

Figure 5  
Sato et al.

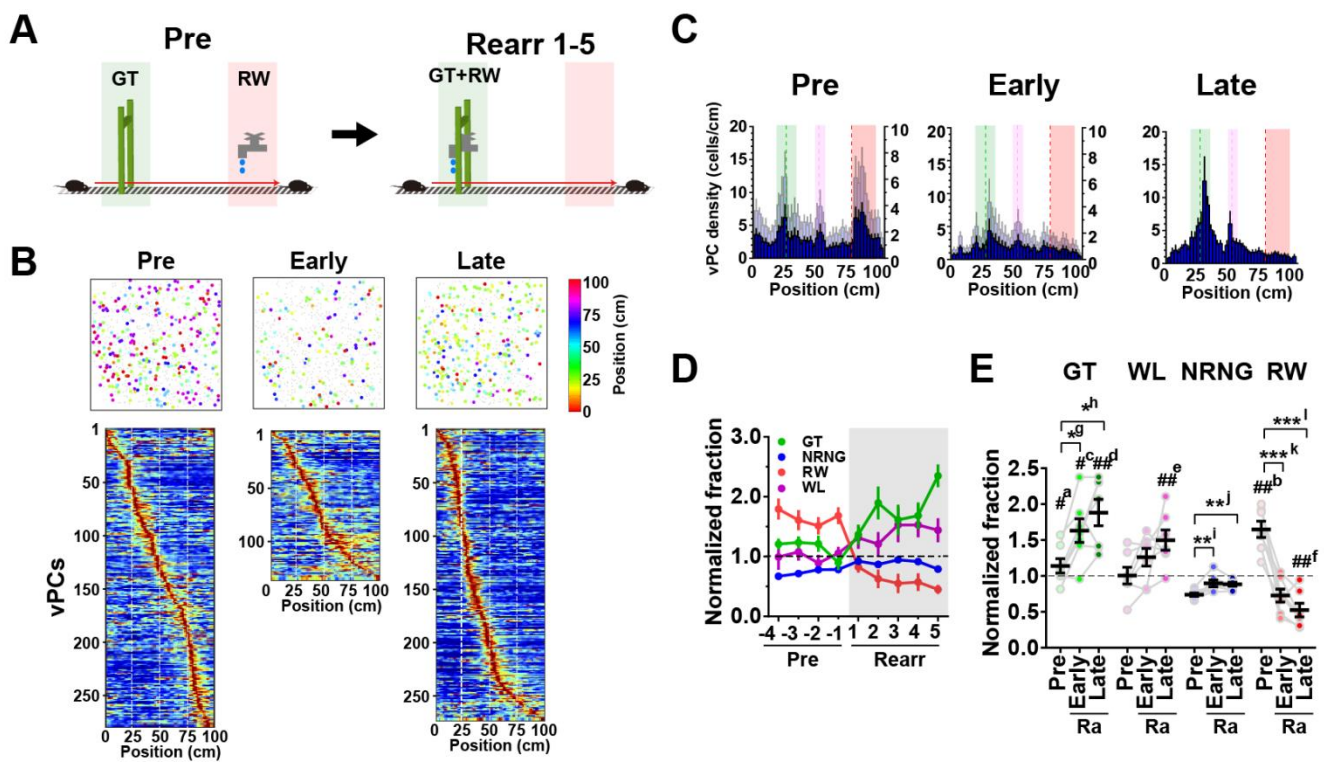

Figure 6  
Sato et al.

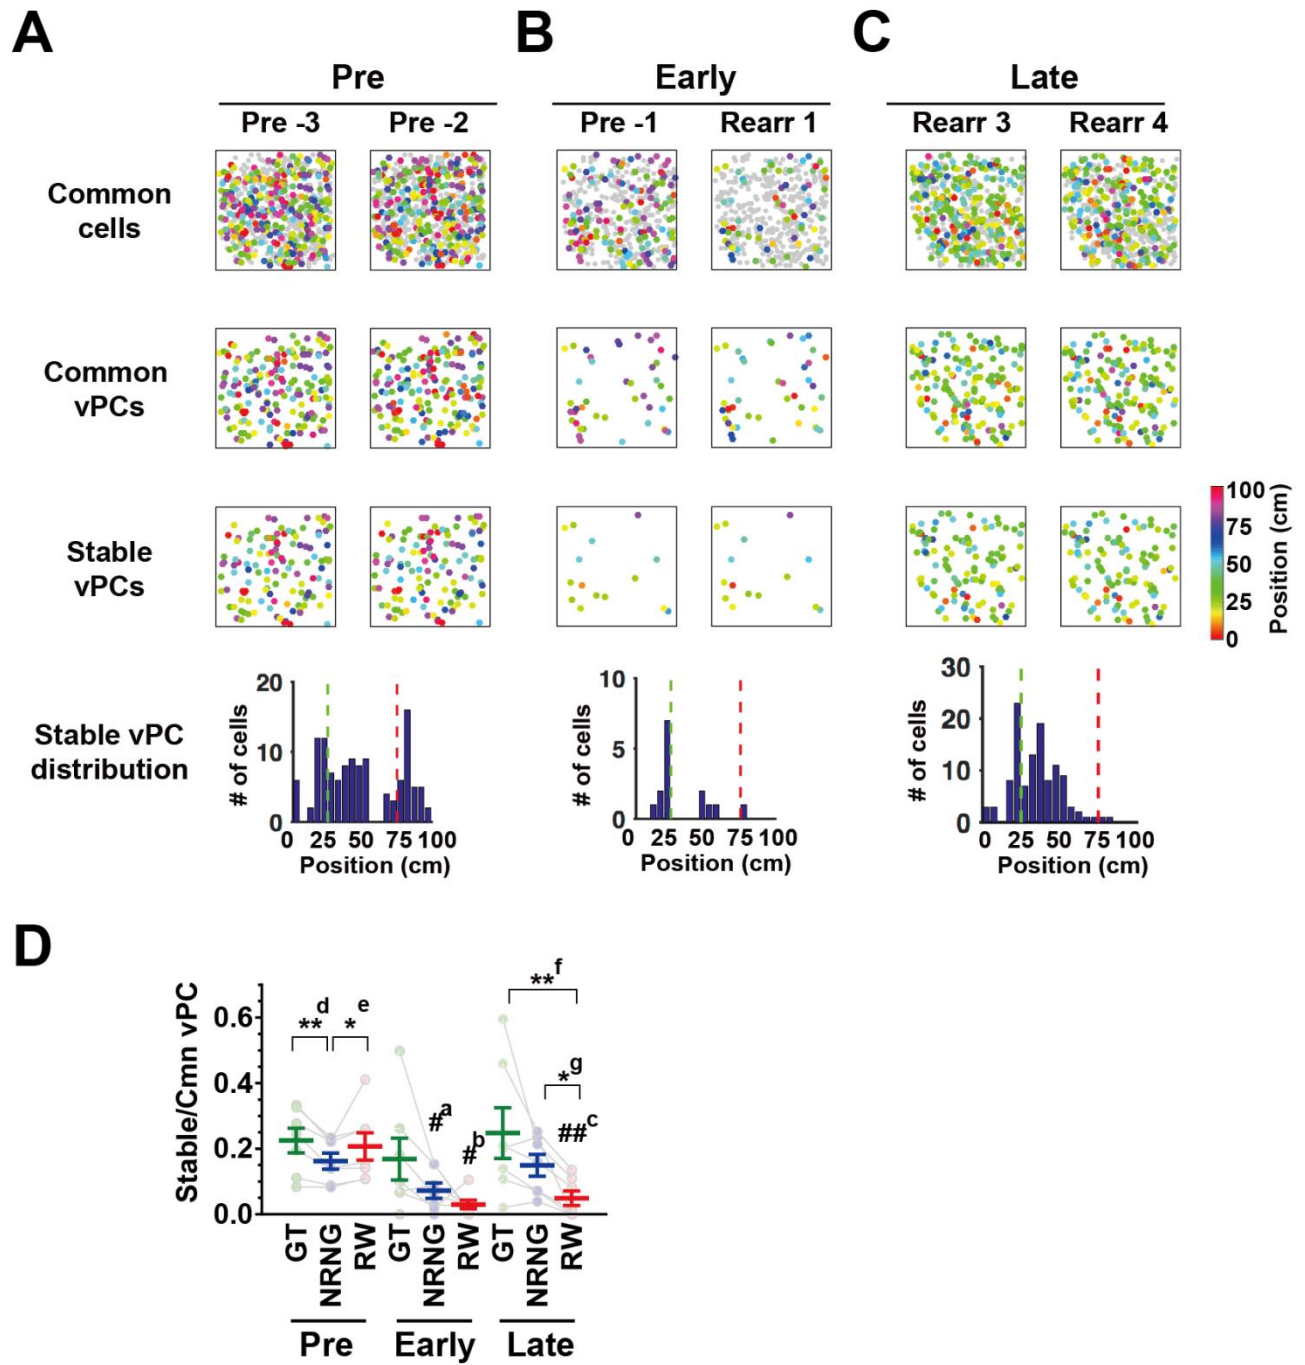

Figure 7  
Sato et al.



**A**

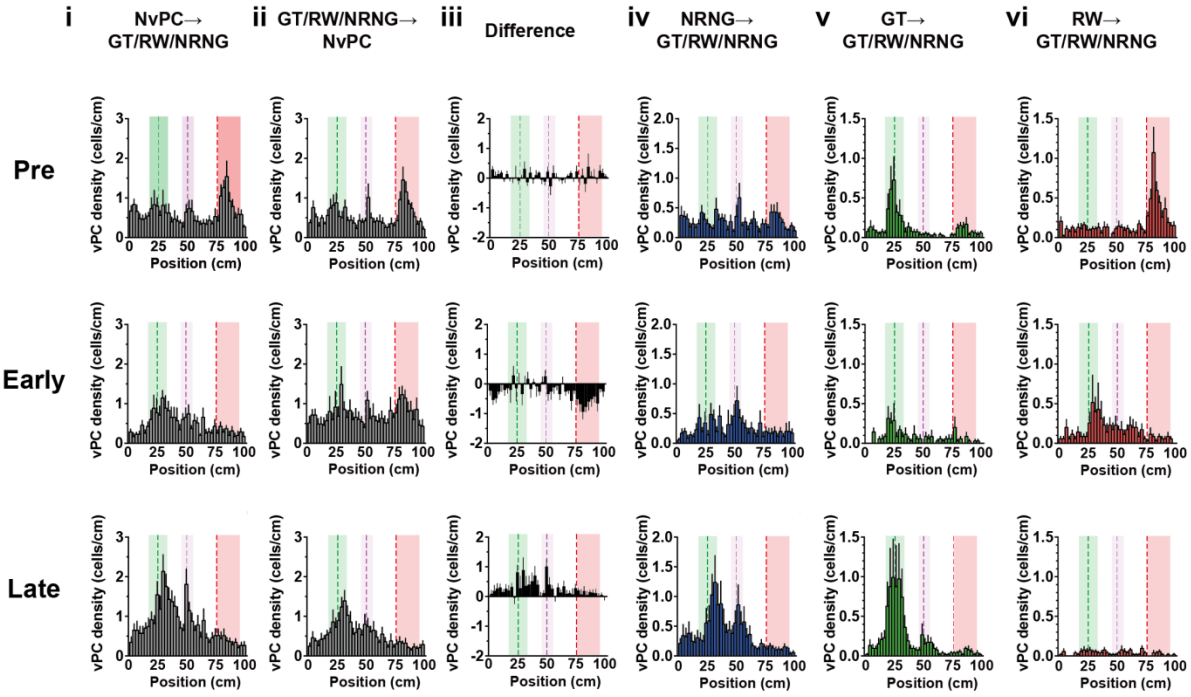

**B**

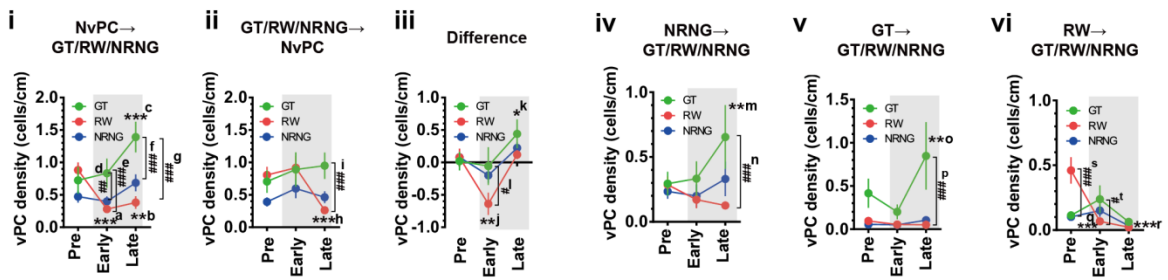

**C**

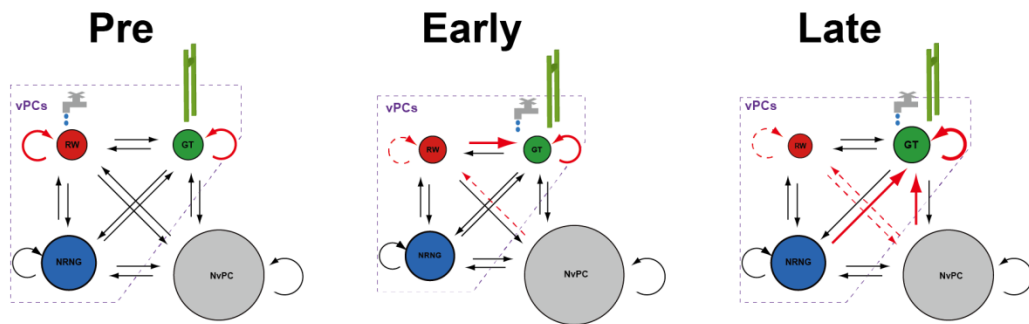

Figure 8  
Sato et al.

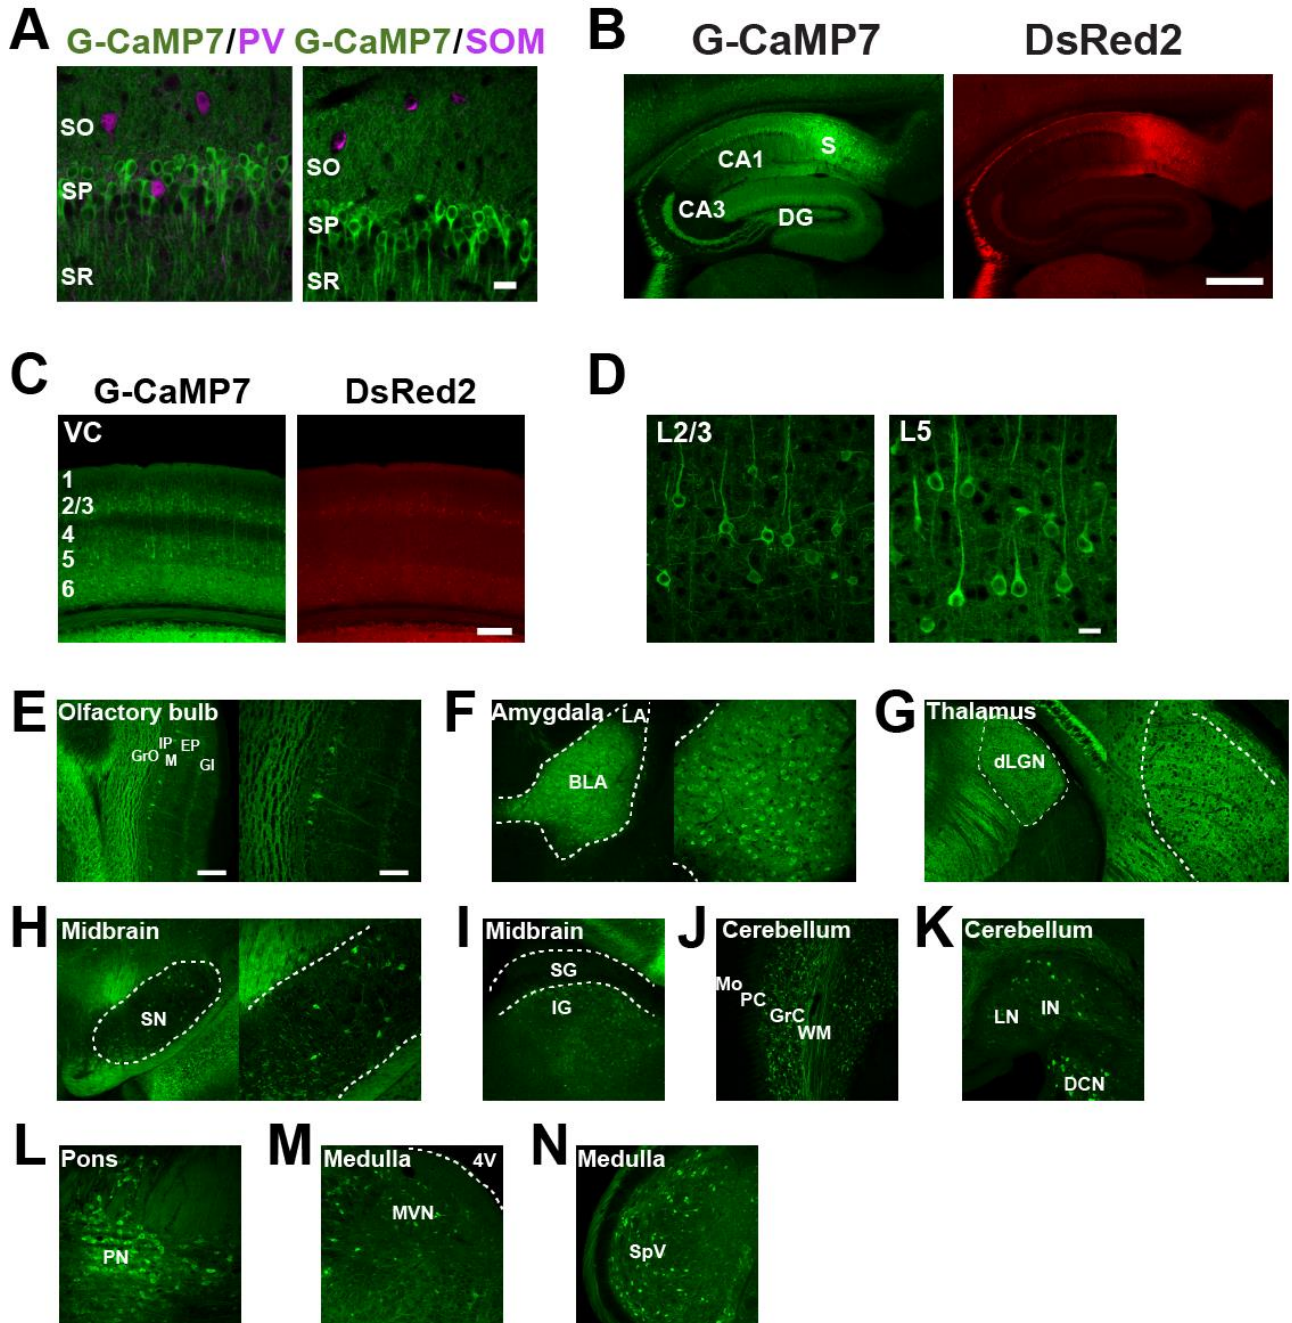

Figure S1  
Sato et al.

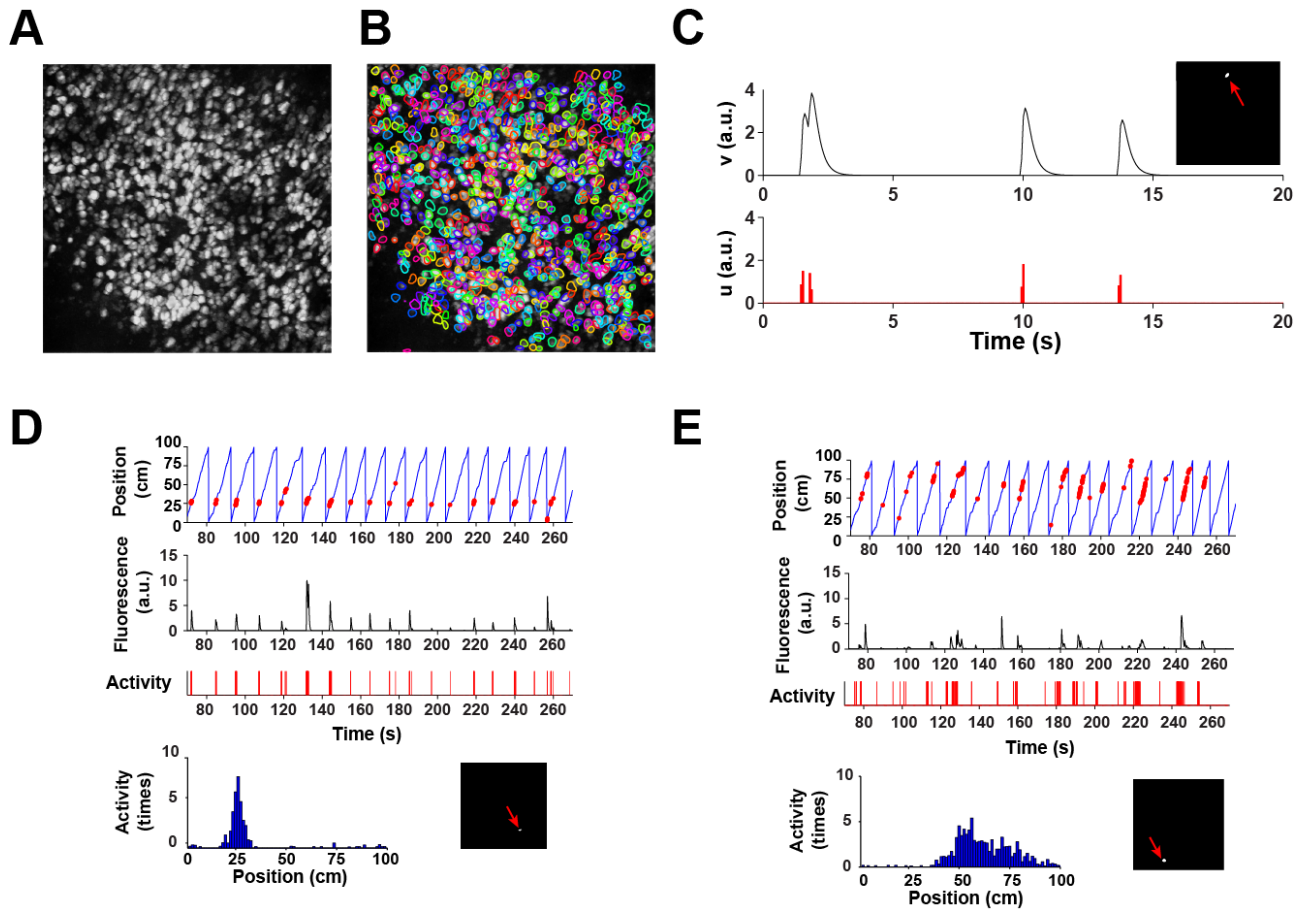

Figure S2  
Sato et al.

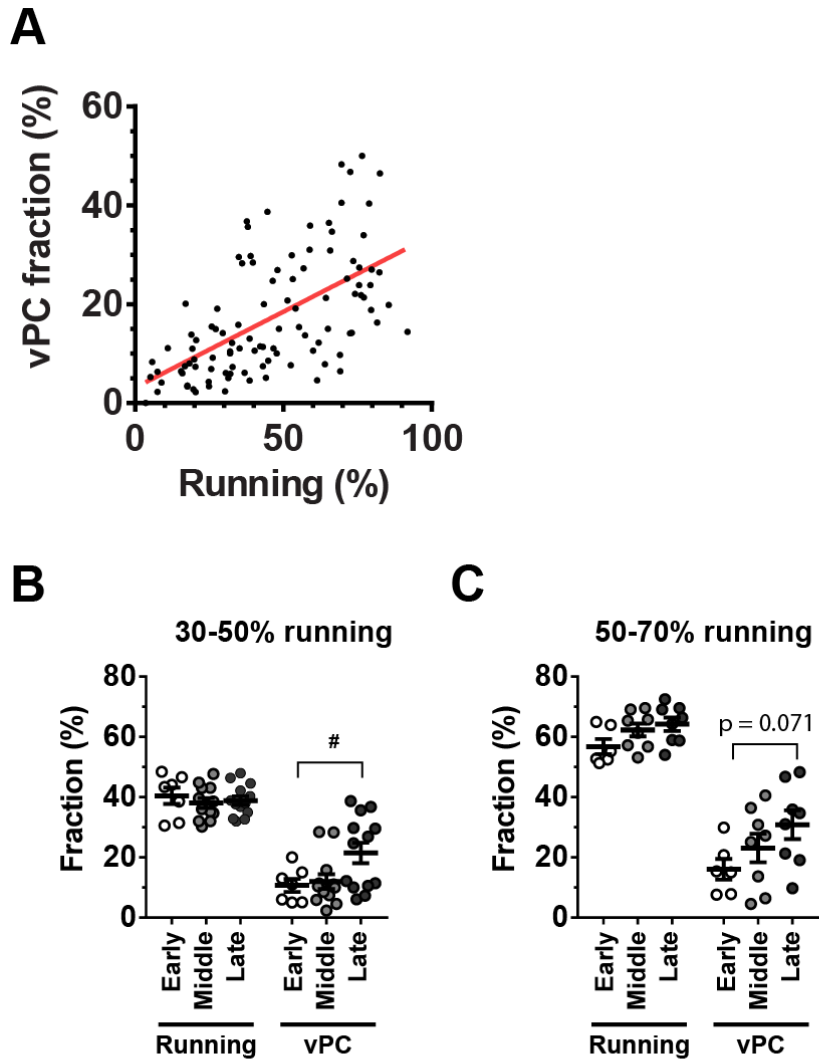

Figure S3  
Sato et al.

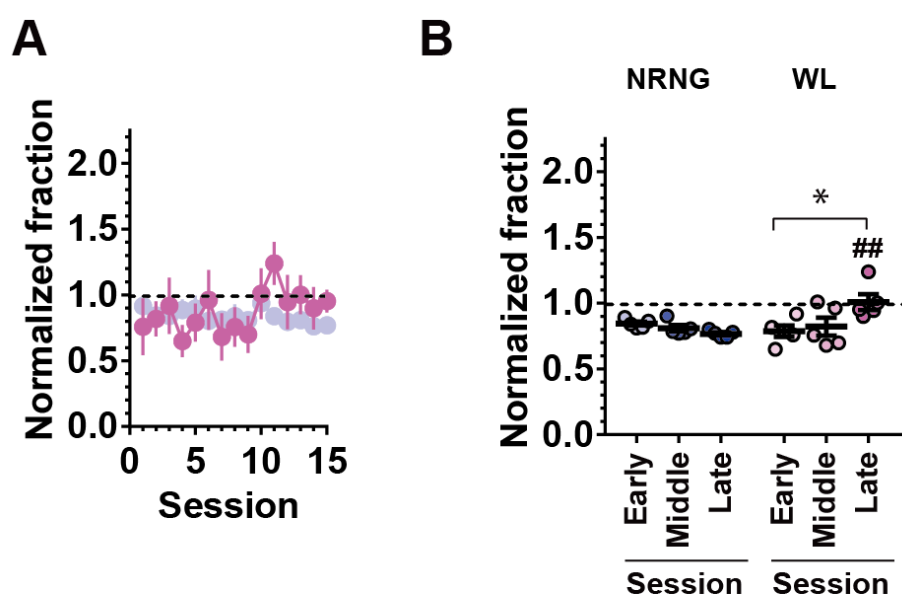

Figure S4  
Sato et al.

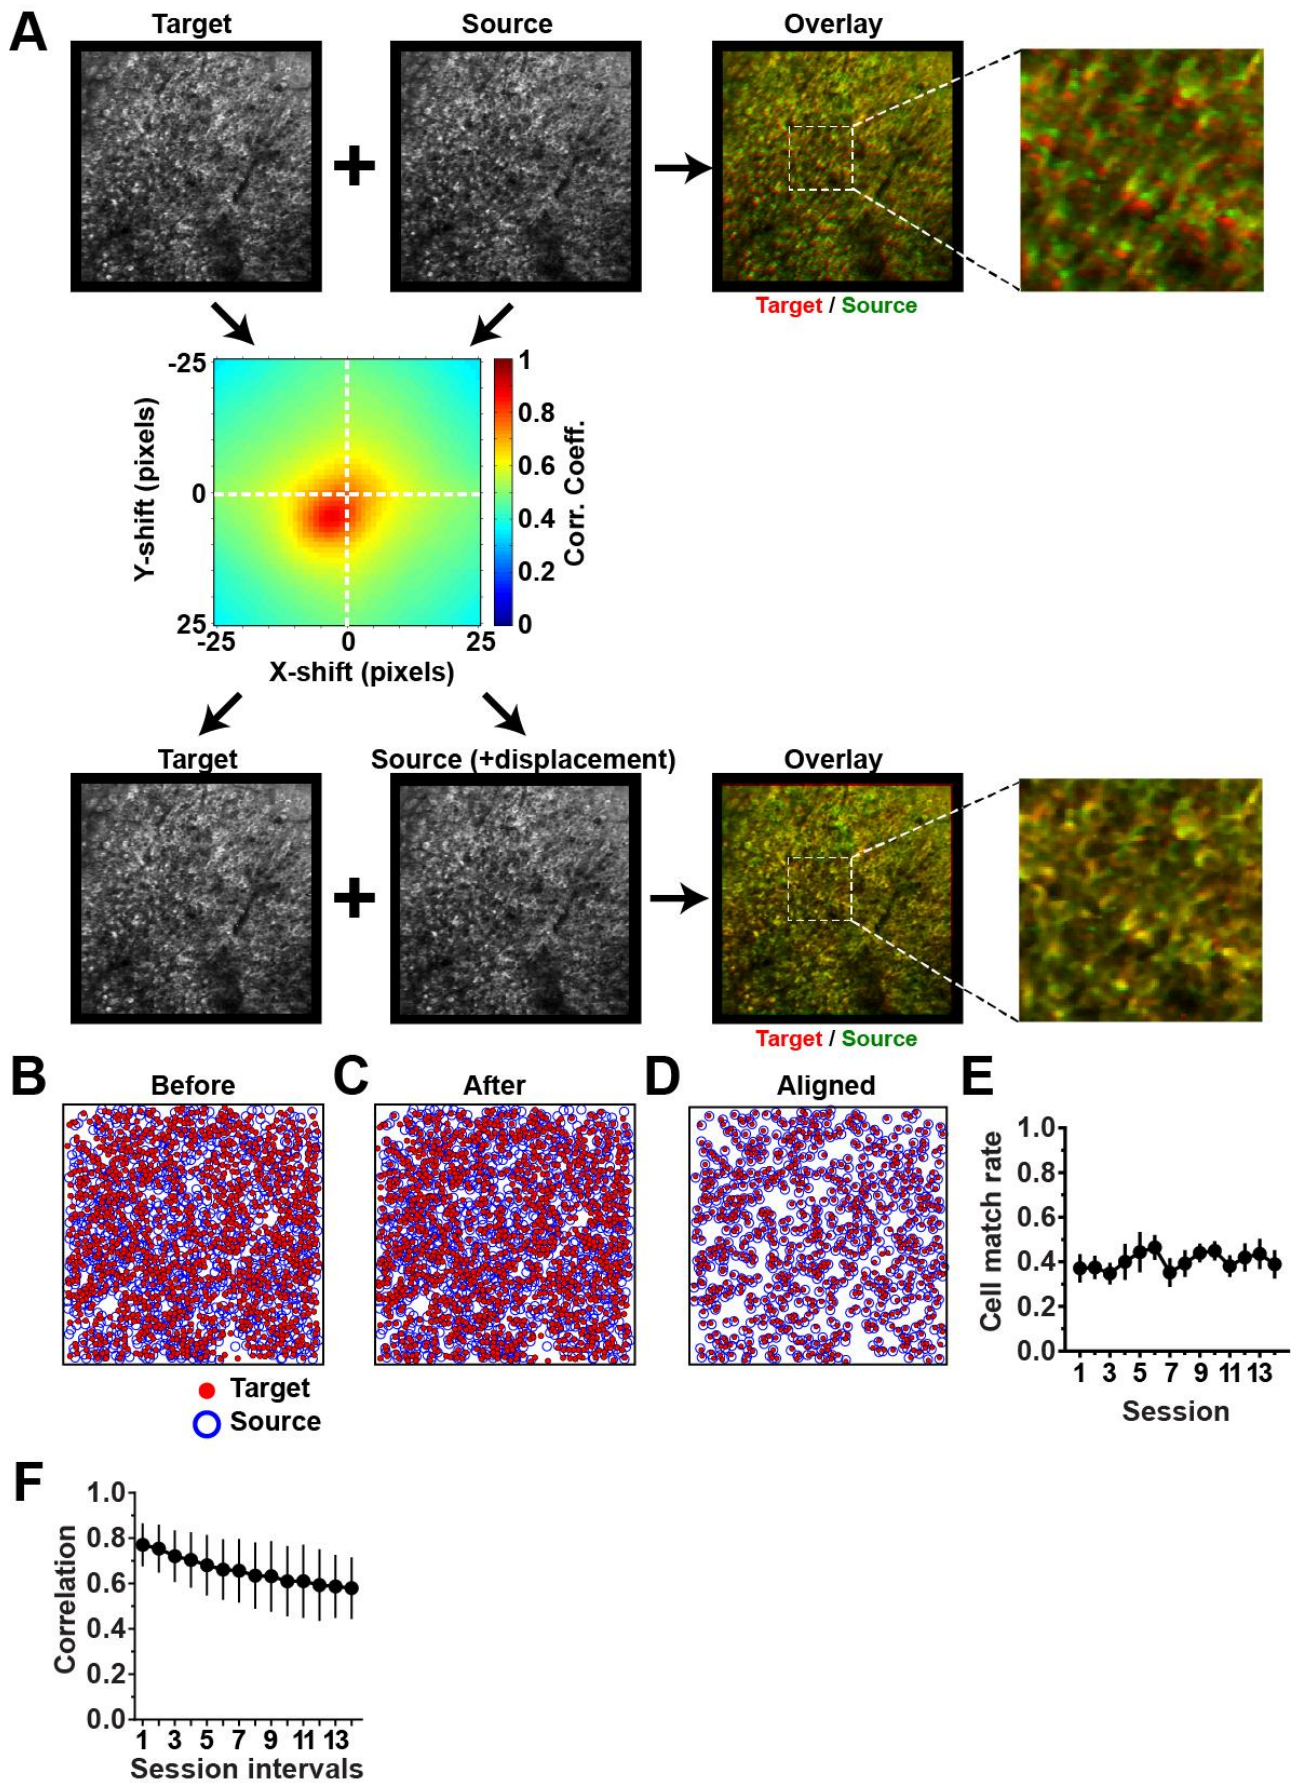

Figure S5  
Sato et al.

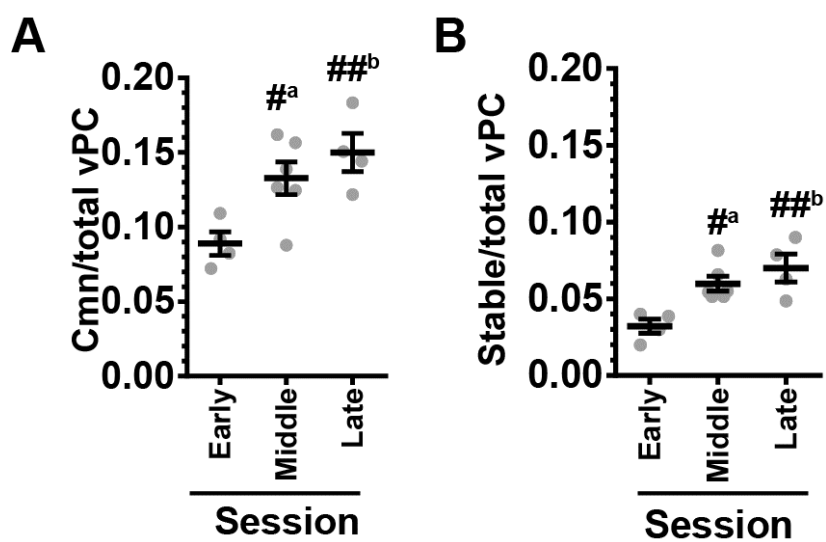

Figure S6  
Sato et al.

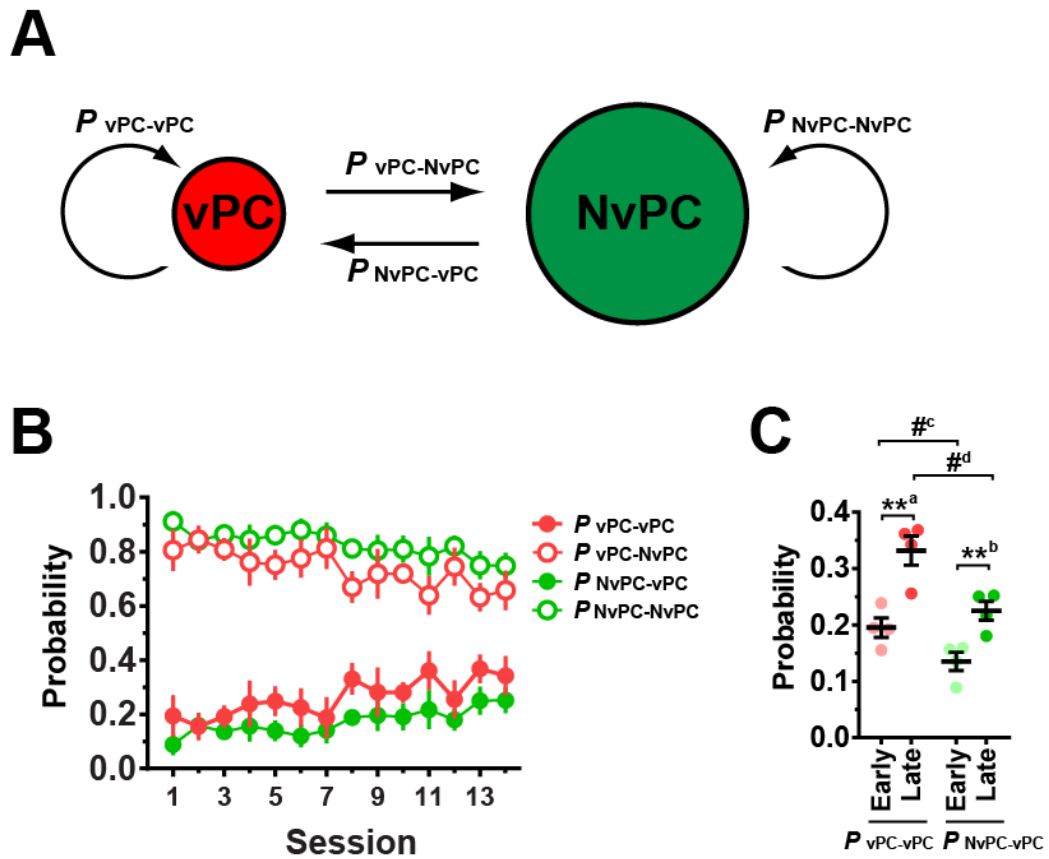

Figure S7  
Sato et al.



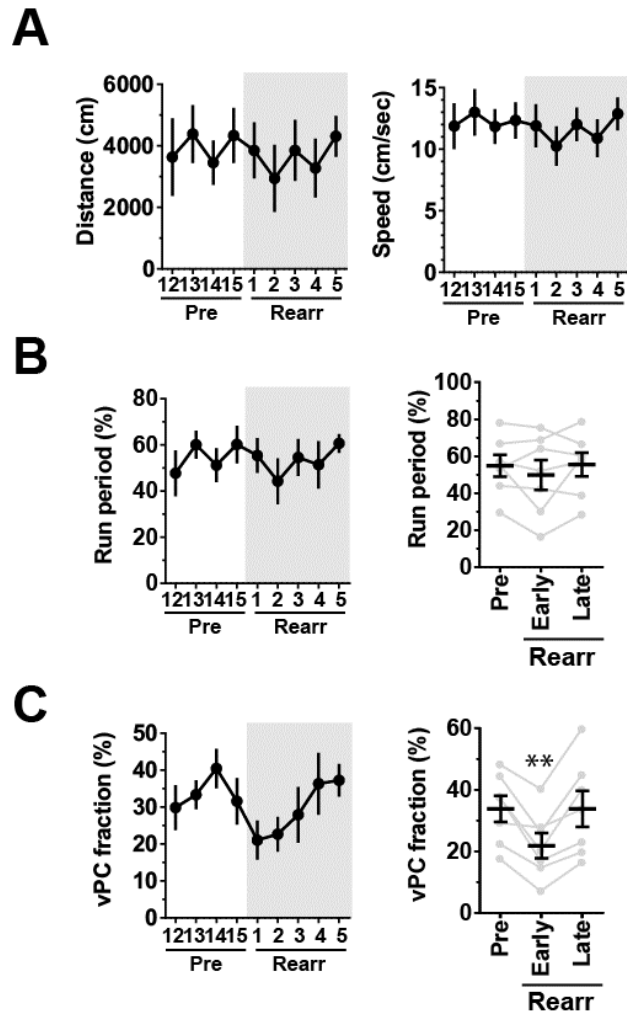

## A Pre

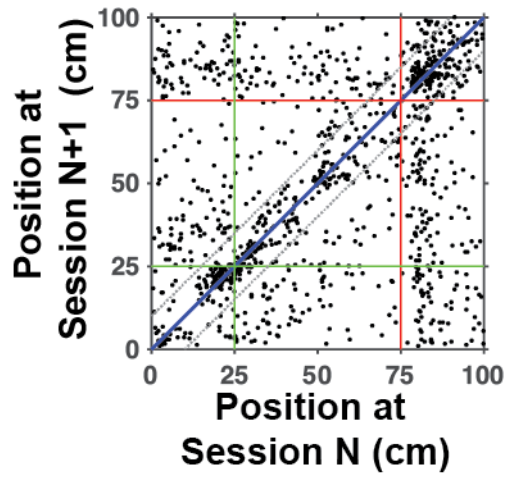

## B Rearr

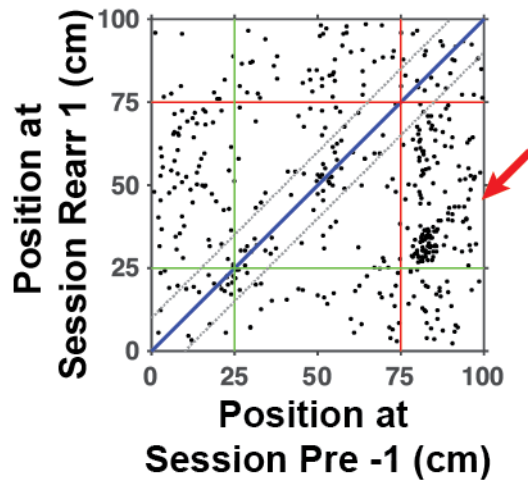

## C Late

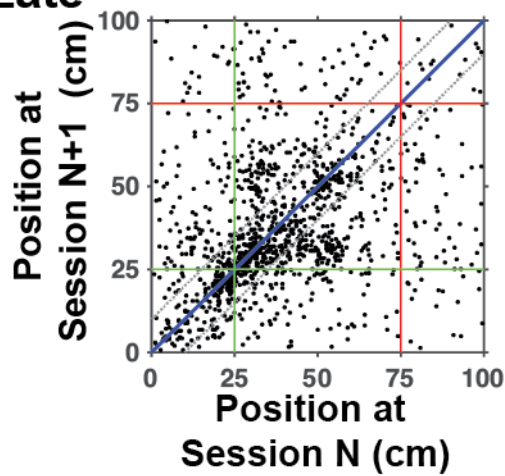

Figure S9  
Sato et al.
